# Supplementary material for: Identifying the lifetime cognitive and socioeconomic antecedents of cognitive state: seven decades of follow-up in a British birth cohort study
Source: PubMed Central journal article supplement (PMC6502022; doi:10.1136/bmjopen-2018-024404), 2019-04-24
Supplement: bmjopen-2018-024404.draft_revisions.pdf [file bmjopen-2018-024404.draft_revisions.pdf]

# BMJ Open

BMJ Open is committed to open peer review. As part of this commitment we make the peer review history of every article we publish publicly available.

When an article is published we post the peer reviewers' comments and the authors' responses online. We also post the versions of the paper that were used during peer review. These are the versions that the peer review comments apply to.

The versions of the paper that follow are the versions that were submitted during the peer review process. They are not the versions of record or the final published versions. They should not be cited or distributed as the published version of this manuscript.

BMJ Open is an open access journal and the full, final, typeset and author-corrected version of record of the manuscript is available on our site with no access controls, subscription charges or pay-per-view fees (<http://bmjopen.bmj.com>).

If you have any questions on BMJ Open's open peer review process please email [info.bmjopen@bmj.com](mailto:info.bmjopen@bmj.com)

# BMJ Open

## Lifetime antecedents of cognitive state: seven decades of follow-up in a national birth cohort study

|                               |                                                                                                                                                                                                                                                                                                                                                                                                                                                                                                                                                            |
|-------------------------------|------------------------------------------------------------------------------------------------------------------------------------------------------------------------------------------------------------------------------------------------------------------------------------------------------------------------------------------------------------------------------------------------------------------------------------------------------------------------------------------------------------------------------------------------------------|
| Journal:                      | <i>BMJ Open</i>                                                                                                                                                                                                                                                                                                                                                                                                                                                                                                                                            |
| Manuscript ID                 | bmjopen-2018-024404                                                                                                                                                                                                                                                                                                                                                                                                                                                                                                                                        |
| Article Type:                 | Research                                                                                                                                                                                                                                                                                                                                                                                                                                                                                                                                                   |
| Date Submitted by the Author: | 30-May-2018                                                                                                                                                                                                                                                                                                                                                                                                                                                                                                                                                |
| Complete List of Authors:     | Richards, M; UCL, MRC Unit for Lifelong Health and Ageing at UCL<br>Stafford, Mai; UCL, MRC Unit for Lifelong Health and Ageing at UCL<br>Sharma, Nikhil; MRC Unit for Lifelong Health and Ageing; University<br>College London Hospitals NHS Foundation Trust National Hospital for<br>Neurology and Neurosurgery<br>Rawle, Mark; MRC Unit for Lifelong Health and Ageing<br>James, Sara Naomi; MRC Unit for Lifelong Health and Ageing<br>Davis, Daniel; MRC Unit for Lifelong Health and Ageing<br>Kuh, Diana; MRC Unit for Lifelong Health and Ageing, |
| Keywords:                     | EPIDEMIOLOGY, Dementia < NEUROLOGY, Old age psychiatry < PSYCHIATRY                                                                                                                                                                                                                                                                                                                                                                                                                                                                                        |
|                               |                                                                                                                                                                                                                                                                                                                                                                                                                                                                                                                                                            |

SCHOLARONE™  
Manuscripts

1  
2  
3 Lifetime antecedents of cognitive state: seven decades of follow-up in a national birth cohort  
4  
5 study  
6

7  
8 Marcus Richards <sup>1</sup>, Mai Stafford <sup>1</sup>, Nikhil Sharma <sup>1,2</sup>, Mark Rawle <sup>1</sup>, Sarah-Naomi James <sup>1</sup>,  
9  
10 Daniel Davis <sup>1</sup>, Diana Kuh <sup>1</sup>.  
11

12  
13 <sup>1</sup>MRC Unit for Lifelong Health and Ageing at UCL, 33 Bedford Place, London WC1B 5JU,  
14  
15 UK  
16

17  
18 <sup>2</sup>National Hospital for Neurology and Neurosurgery, Queen Square, London WC1N 3BG,  
19  
20 UK  
21

22  
23 **Correspondence to** Professor Marcus Richards, MRC Unit for Lifelong Health and Ageing  
24  
25 at UCL, 33 Bedford Place, London WC1B 5JU, UK; [m.richards@ucl.ac.uk](mailto:m.richards@ucl.ac.uk) tel. +44 (0)207  
26  
27 670 5710  
28  
29

30  
31  
32  
33 Word count

34  
35 Abstract: 221

36  
37 Main text: 2813  
38  
39

40  
41  
42 Contributorship statement

43  
44 MR conceived the work, conducted the statistical analyses and wrote the manuscript; MS  
45  
46 advised on the path modelling; MS, NS, MR, SNJ, DD and DK contributed to interpretation  
47  
48 and writing.  
49  
50

## ABSTRACT

**Objectives** The life course determinants of midlife and later life cognitive function have been studied using longitudinal population-based cohort data, but far less is known about whether the pattern of these pathways is similar or distinct for clinically-relevant cognitive state. We investigated this for the Addenbrooke's Cognitive Examination (ACE-III), used in clinical settings to screen for cognitive impairment and dementia.

**Methods** Based on the MRC National Survey of Health and Development (the British 1946 birth cohort), we used path modelling to test direct and indirect associations between APOE status, childhood and midlife socioeconomic position, childhood cognition, education, midlife verbal ability (National Adult Reading Test; NART), and the total ACE-III score.

**Results** *APOE*  $\epsilon 4$  homozygosity showed a direct negative association with the ACE-III score, but not with prior cognition. Consistent with previous findings in this cohort for midlife cognition, the strongest influence on the ACE-III was from childhood cognition; and educational attainment was associated with the ACE-III independently of childhood cognition. The path from childhood cognition to the ACE-III was partly explained by the NART.

**Conclusions** The ACE-III in the general population shows a pattern of life course antecedents that is similar to neuropsychological measures of cognitive function, and may be utilised to represent normal cognitive ageing as well as a screen for cognitive impairment and dementia.

### Strengths and limitations of this study

- The MRC National Survey of Health and Development (the British 1946 birth cohort) is the longest running study of its kind in the world, with a population-based sample and prospectively obtained information on socioeconomic status and educational attainment, and tested cognitive function from childhood
- Little is known about the life course antecedents of cognitive state, as determined by tests of mental status used to screen for cognitive impairment in research and clinical settings
- The Addenbrooke's Cognitive Examination (ACE-III) is the most comprehensive test of cognitive state available
- Path modelling used parameter estimates for incomplete data, thus minimising effects of missing predictor data
- The path structure of our model may be specific to cohort; NSHD is ethnically homogenous and experienced selective secondary education and high occupational mobility at labour market entry). Replication in more diverse populations is therefore required before our model can be considered generalisable

## INTRODUCTION

Using the MRC National Survey of Health and Development (NSHD; the British 1946 birth cohort)[1], we demonstrated multiple paths linking four fundamental developmental and social factors to midlife cognitive function: father's socioeconomic position (SEP), childhood cognitive ability, educational attainment, and own midlife SEP[2]. To our knowledge such a path model to understand key life course influences on cognitive state, as assessed in clinical practice, has not been undertaken. This is partly because the most frequently used tests, such as the Mini Mental Status Examination, are brief and have pronounced ceiling effects. It would however be valuable to investigate whether life course paths to cognitive state show a similar pattern as those for other cognitive functions, which would inform theoretical understanding of, and methodology for, studies of cognitive ageing across the full population range. At the most recent NSHD wave at age 69, the Addenbrooke's Cognitive Examination 3<sup>rd</sup> edition (ACE-III) was administered. This is the most extensive and comprehensive test of cognitive state available, with a quasi-normal distribution. Using this outcome we estimated a path model incorporating father's SEP, childhood cognitive ability, educational attainment and own midlife SEP, and adding two new paths. First, the National Adult Reading Test (NART), an outcome in the original path model, was now included as mediator; we hypothesised that influences on cognitive state operate significantly through this test. Second, the apolipoprotein E (*APOE*) gene was included, the best known genetic risk factor for dementia; based on previous work[3] we hypothesised that the  $\epsilon 4$  allele of this gene would be negatively associated with the ACE-III score but not with childhood cognition.

## METHODS

### Participants

The NSHD is a representative sample of 5362 males and females born in England, Scotland, and Wales in one week in March 1946 (<http://www.nshd.mrc.ac.uk/nshd>). The 24th data collection was conducted between 2014 and 2015 when study members were aged 68-69 years[1]. At age 69 study members still alive and with a known current address in mainland Britain (n=2698) were invited to have a home visit by a trained nurse; 2149 (79.7%) completed a visit and a further 55 (2.0%) completed a postal questionnaire instead. Of the original cohort, 1026 (19.1%) had died, 578 (10.8%) were living abroad, 22 (0.4%) asked for their participation to be restricted to postal contacts, 621 (11.6%) had previously withdrawn from the study, and 417 (7.8%) had been lost to follow-up. For this data collection we obtained ethical approval from the NRES Queen Square REC (14/LO/1073), and Scotland A REC (14/SS/1009). All participants gave written informed consent to collect these data.

### Measures

Principal outcome: the ACE -III

The ACE-III is a screen-implemented test of cognitive state[4]. The ACE-III is divided into five domains: attention & orientation (scored 0-18), verbal fluency (0-14), memory (0-26), language (0-26), and visuospatial function (0-16). Thus the maximum total score is 100. Due to the inclusion of verbal fluency, the distribution of the total score is quasi-normal and avoids the pronounced ceiling effect of most cognitive state tests. A customised version of the ACE-III was administered by iPad using ACEMobile (<http://www.acemobile.org/>); where this was not possible, a paper version was used. All offline scoring was undertaken by trained personnel. Of the 2149 participants who had a home visit, 32 refused or were unable to undertake the ACE-III. Of the remaining 2117, 35 undertook but did not complete this; and

1  
2  
3 for the remaining 2082, data for 353 were lost through equipment failure. Thus complete  
4 ACE-III data were available for 1729 participants, 80·5% of those who received a home visit.  
5  
6  
7

#### 8 9 APOE genotype

10 Genetic data were assayed from a blood sample taken at age 53 by a research nurse.

11  
12 KBioscience then completed analysis of SNPs rs429358 and rs7412 which were used to  
13 determine APOE genotype. Distribution of alleles was as follows,  $\epsilon 2/\epsilon 2$  n=20 (0·76%),  $\epsilon 2/\epsilon 3$   
14 n=307 (11·64%),  $\epsilon 3/\epsilon 3$  n=1520 (57·64%),  $\epsilon 2/\epsilon 4$  n=67 (2·54%),  $\epsilon 3/\epsilon 4$  n=639 (24·23%),  $\epsilon 4/\epsilon 4$   
15 n=84 (3·19%). For analysis, APOE genotype was recoded categorically for the homozygous  
16 or heterozygous presence of  $\epsilon 4$  alleles, with carriers of  $\epsilon 2$  included as non *APOE*  $\epsilon 4$  carriers.  
17  
18 Because of difficulties in interpreting potentially opposing effects on cognition, the 67  
19 participants with  $\epsilon 2/\epsilon 4$  were excluded from analyses. Thus APOE was categorized as no  $\epsilon 4$ ;  
20 heterozygous  $\epsilon 4$ ; and homozygous  $\epsilon 4$ .  
21  
22

23  
24 Choice of the following five path variables followed Richards & Sacker[2]:  
25  
26  
27  
28  
29  
30

#### 31 32 Early life SEP

33  
34 Early life SEP was assessed using the occupational social class of the father, classified when  
35 participants were aged 11 (or at 4 or 15 years if this was unknown) according to the UK  
36 Registrar General: professional, managerial, intermediate, skilled manual, semiskilled  
37 manual, unskilled. For comparability with the other variables these were coded so that higher  
38 values corresponded to higher position.  
39  
40  
41  
42  
43  
44  
45  
46  
47  
48  
49  
50  
51

#### 52 53 Childhood cognitive function

54  
55  
56  
57  
58  
59  
60



1  
2  
3 At 8 years participants took tests of verbal and nonverbal ability devised by the National  
4 Foundation for Educational Research[5], and administered by teachers or other trained  
5 personnel. These tests were: (1) reading comprehension (selecting appropriate words to  
6 complete 35 sentences), (2) word reading (ability to pronounce 50 words), (3) vocabulary  
7 (ability to explain the meaning of these 50 words), and (4) picture intelligence, consisting of a  
8 60-item nonverbal reasoning test. Scores for each test were standardized to the whole sample,  
9 then summed to create a total score representing overall cognitive ability at this age.  
10  
11  
12  
13  
14  
15  
16  
17  
18  
19

#### 20 Educational attainment

21  
22 The highest educational or training qualification achieved by 26 years was grouped into no  
23 qualification, below ordinary secondary qualifications (vocational), ordinary secondary  
24 qualifications ('O' levels and their training equivalents), advanced secondary qualifications  
25 ('A' levels and their equivalents), or higher qualifications (degree or equivalent).  
26  
27  
28  
29  
30  
31  
32

#### 33 Adult SEP

34  
35 Own current or last occupation by age 53 years was measured using similar categories to  
36 those for paternal occupation, and similarly coded so that higher values corresponded to  
37 higher position.  
38  
39  
40  
41  
42  
43

#### 44 The NART

45  
46 The NART assesses ability to pronounce 50 words of increasing difficulty[6]. These words  
47 violate conventional pronunciation rules, and are therefore unlikely to be read correctly  
48 unless the reader is familiar with them rather than relies on intelligent guesswork. Thus as a  
49 measure of 'crystallized' cognitive ability the NART is relatively insensitive to age and  
50 morbidity-associated decline, and serves as a measure of general cognitive ability. By  
51  
52  
53  
54  
55  
56  
57  
58  
59  
60

1  
2  
3 convention the NART is scored for errors, but for consistency with the childhood cognitive  
4 measure this was reverse-coded.  
5  
6  
7

### 8 9 **Statistical methods**

10 All statistical analyses were conducted using Mplus version 5[7]. A preliminary multivariable  
11 linear regression model was used to test mutually adjusted associations between each of the  
12 predictor variables and the ACE-III total score. This incorporated full information maximum  
13 likelihood (FIML) parameter estimates to include those with item-missingness. FIML is  
14 preferable to estimation based on complete data, since FIML estimates tend to be less biased  
15 and more reliable than estimates based on list-wise deletion, even when the data deviate from  
16 missing at random and are non-ignorable[8]. However, each of these predictor variables are  
17 themselves closely related. Hence path modelling was then used to quantify their inter-  
18 associations independently of their associations with the ACE-III. We hypothesized two key  
19 components within this model: 1. strong paths from childhood cognition and the NART to the  
20 ACE-III, with modest and weak additional contributions from education and midlife SEP,  
21 respectively, and no direct path from childhood SEP[2]; 2. a direct negative path from APOE  
22  $\epsilon 4$  to the ACE-III but not via childhood cognition[3] or the NART. The path model also  
23 incorporated FIML. Three criteria were used to assess model fit: 1. the  $\chi^2$  test, although this  
24 can be overly sensitive to model misspecification when sample sizes are large; 2. the root  
25 mean square error of approximation (RMSEA), which gives a measure of the discrepancy in  
26 fit per degrees of freedom. It is bounded below by zero, only taking this value if the model  
27 fits exactly. If the RMSEA is  $< 0.05$ , the model is considered a close fit to the data; 3. the  
28 comparative fit index (CFI), whose values are restricted to a 0 to 1 continuum, with higher  
29 values indicating a better fit. CFI is normally tested against a minimum criterion value of  
30 0.95.  
31  
32  
33  
34  
35  
36  
37  
38  
39  
40  
41  
42  
43  
44  
45  
46  
47  
48  
49  
50  
51  
52  
53  
54  
55  
56  
57  
58  
59  
60

## RESULTS

### Descriptive

As noted, sample size was 1729, the maximum N for the ACE-III. Of those interviewed at age 69, there were no differences in any of the path variables between those with and without ACE-III data. Frequencies for each category of APOE group, childhood and midlife SEP and educational attainment, and means and SDs for the ACE-III and NART, are shown in Table 1.

**Table 1** Frequency distributions for APOE group, childhood and midlife SEP, educational attainment, and mean NART and ACE-III scores (for 1729 participants with ACE-III data)

| Variable                      | N                    | %      | N             | %      |
|-------------------------------|----------------------|--------|---------------|--------|
| <b>APOE</b>                   |                      |        |               |        |
| No $\epsilon 4$               | 1060                 | (61.3) |               |        |
| Heterozygous $\epsilon 4$     | 369                  | (21.3) |               |        |
| Homozygous $\epsilon 4$       | 47                   | (2.7)  |               |        |
| Missing                       | 253                  | (14.6) |               |        |
| <b>SEP</b>                    |                      |        |               |        |
|                               | Childhood (father's) |        | Midlife (own) |        |
| Professional                  | 130                  | (7.5)  | 140           | (8.1)  |
| Managerial                    | 362                  | (20.9) | 687           | (39.7) |
| Intermediate                  | 289                  | (16.7) | 418           | (24.2) |
| Skilled manual                | 514                  | (29.7) | 253           | (14.6) |
| Semiskilled                   | 267                  | (15.4) | 168           | (9.7)  |
| Unskilled                     | 77                   | (4.5)  | 52            | (3.0)  |
| Missing                       | 90                   | (5.2)  | 11            | (0.6)  |
| <b>Educational attainment</b> |                      |        |               |        |
| No qualifications             | 495                  | (28.6) |               |        |
| Vocational only               | 127                  | (7.3)  |               |        |
| Ordinary ('O') level          | 354                  | (20.5) |               |        |

1  
2  
3           Advanced ('A') level           483   (27·9)

4  
5           Higher                           185   (10·7)

6  
7           Missing                           85    (4·9)

8  
9  
10  
11                                            Mean (SD)

12  
13           NART                            91.58 (5.91)

14  
15           ACE-III                         35.61 (8.91)

---

16  
17  
18  
19  
20  
21  
22  
23  
24           **Preliminary multivariable regression analyses**

25  
26           Results for the preliminary multivariable linear regression analysis are shown in Table 2.

**Table 2** Standardized linear regression coefficients representing associations between gender, APOE status, childhood SEP, childhood cognition, educational attainment, midlife SEP and the NART, and the total ACE-III score at age 69 years (n=1729)

| Variable                  | $\beta$ | 95% CI        | p-value |
|---------------------------|---------|---------------|---------|
| Female gender             | 0.04    | 0.00, 0.08    | .05     |
| APOE                      |         |               |         |
| No $\epsilon 4$ (ref)     | -       | -             | -       |
| Heterozygous $\epsilon 4$ | -0.006  | -0.05, 0.04   | .77     |
| Homozygous $\epsilon 4$   | -0.04   | -0.09, -0.003 | .04     |
| Childhood SEP             | 0.04    | -0.008, 0.08  | .11     |
| Childhood cognition       | 0.18    | 0.12, 0.23    | <.0001  |
| Educational attainment    | 0.10    | 0.05, 0.16    | <.0001  |
| Midlife SEP               | 0.07    | 0.02, 0.12    | .003    |
| NART                      | 0.34    | 0.28, 0.40    | <.0001  |

*Note.* All coefficients are mutually adjusted, and represent change per point or level increase except for APOE, which are categorical. Abbreviations:  $\beta$ =standardized beta coefficient; CI=confidence intervals.

1  
2  
3 The strongest associations with the ACE-III were from prior cognition, above all the NART  
4 (standardized regression coefficient  $\beta=0.34$  (0.28, 0.40)), then childhood cognition ( $\beta=0.18$   
5 (0.12, 0.23)). Educational attainment showed a modest association ( $\beta=0.10$  (0.05, 0.16)),  
6 with midlife SEP somewhat weaker ( $\beta=0.07$  (0.02, 0.12)). There was no independent  
7 association with childhood SEP ( $\beta=0.04$  (-0.01, 0.08)). When compared with absence of  
8 APOE  $\epsilon 4$ ,  $\epsilon 4$  homozygosity was weakly negatively associated with the ACE-III score ( $\beta=-$   
9 0.04 (-0.09, -0.003)), but not heterozygosity ( $\beta=-0.01$  (-0.05, 0.04)). Female gender was  
10 weakly positively associated with this score ( $\beta=0.04$  (0, 0.08)).  
11  
12  
13  
14  
15  
16  
17  
18  
19  
20  
21

### 22 Path model

23  
24 Figure 1 shows the path model. All paths are mutually adjusted, and, following the regression  
25 model, paths were adjusted for gender. Goodness of fit statistics indicated that the model was  
26 an adequate representation of the data ( $\chi^2=7.96$ ,  $df=6$ ,  $p=0.24$ ; RMSEA=0.01, 95% CI=0-  
27 0.04,  $p=1.0$ ; CFI = 1.0). All non-significant paths ( $P$  value  $>.05$ ) were removed in the final  
28 model shown.  
29  
30  
31  
32  
33

34  
35 [Figure 1 about here]  
36

37 The strongest influences on the ACE-III score were from the NART, and from childhood  
38 cognition, which was mainly associated with the ACE-III via educational attainment and the  
39 NART, but also directly with the ACE-III. The influence of midlife SEP was more modest,  
40 and was itself part-mediated by the NART. There was no direct path from childhood SEP to  
41 the ACE-III, but childhood SEP had independent associations with childhood cognition,  
42 educational attainment and midlife SEP, in descending order of magnitude. APOE  $\epsilon 4$   
43 homozygosity showed a modest direct negative association with the ACE-III score, but was  
44 not associated with childhood cognition or the NART; and  $\epsilon 4$  heterozygosity was not  
45 associated with any cognitive variable.  
46  
47  
48  
49  
50  
51  
52  
53  
54  
55  
56  
57  
58  
59  
60

## DISCUSSION

In the NSHD we estimated a path model describing key life course influences on cognitive state using the Addenbrooke's cognitive examination (ACE-III). Confirming our main study hypothesis, by far the strongest influence on this outcome was from lifetime cognition, most strongly from general cognitive ability in midlife, assessed by the NART. The NART in turn was particularly influenced by childhood cognition. To a lesser extent educational attainment was positively associated with the ACE-III, independently of childhood cognition, although the model suggests that this was part-mediated by the NART. Own SEP showed more modest effects still, and there was no direct association between childhood SEP and the ACE-III. Finally, there was a direct negative association between the *APOE*  $\epsilon 4$  allele and the ACE-III;  $\epsilon 4$  was not associated with childhood cognitive function, or with the NART. The pattern of associations for SEP, childhood cognition and education broadly reflect those previously shown in this cohort when the NART was an outcome rather than a predictor[2], even with an important genetic influence on cognitive function (*APOE*  $\epsilon 4$ ) controlled. However, it is notable that, with the NART controlled, childhood cognition, education and midlife SEP additionally showed direct associations with the ACE-III, with childhood cognition having the strongest effect, and midlife SEP the weakest.

Major strengths of this study are: 1. the use of a large representative population-based birth cohort; 2. the most extensive and comprehensive measure of cognitive state (ACE-III) available as an outcome; 3. prospective measures across the life course, including tested childhood cognition, which enabled the first comprehensive prospective life course model of mental state; 4. path modelling that uses FIML parameter estimates for incomplete data, thus minimizing effects of missing predictor data. Against these strengths we should note that the path structure of our model may be specific to cohort (NSHD is ethnically homogenous) and period (NSHD experienced selective secondary education and high occupational mobility at



1  
2  
3 labor market entry). While our previous work suggests a broadly robust path structure in the  
4 face of social change[9], replication in more diverse populations is required before our model  
5 can be considered generalizable.  
6  
7

8  
9  
10 Our path model suggests that cognitive state has a prominent general cognitive ability  
11 component, which in turn has cognitive antecedents extending back into childhood. It might  
12 be argued that the influence of the NART is a matter of circularity, reflecting the dominance  
13 of verbal-based tests within the ACE-III (accounting for 84% of the total score). However,  
14 the NART also correlates with non-verbal skills[5]. The most obvious difference between the  
15 NART and the ACE-III is that the constituent tests of the latter are ‘fluid’ measures, sensitive  
16 to age and morbidity-associated decline; whereas the former, as a measure of ‘crystallized’  
17 ability, is stable even in the face of mild dementia[10]. Further follow-up will determine  
18 whether the cognitive paths within our model retain their magnitude and pattern as the ACE-  
19 III scores change over time.  
20  
21  
22  
23  
24  
25  
26  
27  
28  
29  
30

31  
32 In regard to the long-term cognitive antecedents of the ACE-III, the present study extends our  
33 previous studies showing that childhood cognition tracks across the life course even when  
34 education, lifetime socioeconomic position<sup>2</sup> and adolescent mental health[11] are controlled.  
35 This tracking is also consistent with earlier studies in relation to cognitive ageing[12] and risk  
36 of dementia[13,14]; and with studies showing that associations between tests of mental state  
37 and verbal cognitive ability are strongly explained by childhood cognitive function[15,16].  
38 We also observed an additional direct association between childhood cognition and the ACE-  
39 III that was independent of the NART as well as other factors in the model. This is probably  
40 because the measures of childhood cognition capture a wider range of function than the  
41 NART, including nonverbal reasoning, even though, as noted, the NART itself predicts a  
42 comprehensive range of cognitive function[5].  
43  
44  
45  
46  
47  
48  
49  
50  
51  
52  
53  
54  
55  
56  
57  
58  
59  
60

1  
2  
3 The next most prominent influence on the ACE-III was from educational attainment. This  
4 was associated with the ACE-III even when childhood cognition was controlled. As with  
5 childhood cognition itself, the influence of education was largely through the NART,  
6 although again there was a modest independent association with the ACE-III, since education  
7 also shapes non-verbal cognitive skills[17]. An association between education and  
8 subsequent cognition independent of childhood cognition has long been observed[18]; has  
9 been replicated in two other birth cohorts[19]; is shown in NSHD to be additive with respect  
10 to adult education[20]; and responds rapidly to policy[9]. By way of interpretation, it is  
11 important to note that schooling is not just a process of ‘cognitive stimulation’. Schools  
12 indeed teach specific knowledge, but can also teach practical skills, including how to  
13 approach cognitive testing, refine other cognitive skills, and shape non-cognitive skills that  
14 are likely to have long-term benefit to cognitive function[21,11]. Policies to improve access  
15 to education, and widen educational curricula to strengthen all these skills, are likely to have  
16 long-term benefits to cognitive ageing, and risk of dementia.

17  
18  
19  
20  
21  
22  
23  
24  
25  
26  
27  
28  
29  
30  
31  
32  
33  
34 Finally, we should consider the role of APOE in the model. This is involved in the transport  
35 of cholesterol and other lipids between cellular structures, and  $\epsilon 4$  has a higher rate of  
36 lipoprotein clearance thus altering its bioavailability[22]. APOE is also involved in clearing  
37 beta amyloid from the brain, and  $\epsilon 4$  may be less efficient at this[23]. A direct association  
38 between the  $\epsilon 4$  allele and the ACE-III was found in our model; this was of relatively weak  
39 magnitude, was only observed in homozygotes, and was not observed with any other variable  
40 in the model including prior cognitive function. These findings are consistent with evidence  
41 that  $\epsilon 4$  zygosity shows a dose-response for Alzheimer’s disease[24]; with a study showing no  
42 association with childhood cognition although observed in old age in the same cohort[3]; and  
43 with parallel evidence from NSHD that decline in verbal memory from age 43 to 69 is faster  
44 in APOE homozygosity[25]. There is no consensus over whether APOE is associated with  
45  
46  
47  
48  
49  
50  
51  
52  
53  
54  
55  
56  
57  
58  
59  
60

1  
2  
3 normal cognitive ageing as opposed to clinical decline[3,24,25-30]. However, this may be  
4 age-dependent[27]; intriguingly, while no association was found between  $\epsilon 4$  and fluid  
5 cognitive measures in NSHD at age 53[28], this association is now evident 16 years later,  
6  
7 albeit modestly. It should also be highlighted that the presence of APOE in the model means  
8 that the structure and magnitude of the pathways, including those between parental social  
9 class and childhood cognition, were independent of this. Adding APOE does not of course  
10 comprehensively control for genetic influence on cognitive ageing. However, the  $\epsilon 4$  allele of  
11 this gene is the best-known genetic risk factor for clinically significant cognitive decline[31].  
12  
13  
14  
15  
16  
17  
18  
19  
20

21 In conclusion, the ACE-III in the general ageing population shows a pattern of life course  
22 antecedents that is similar to neuropsychological measures of cognitive function. This may  
23 not have emerged from studies using briefer tests of cognitive state such as the MMSE, since  
24 most of these have ceiling effects outside the clinical context that limit their use as  
25 continuous measures. As noted, continuing follow-up of NSHD will elucidate whether the  
26 path structure we describe here changes as an increasing number of participants meet clinical  
27 criteria for dementia, and the distribution of the ACE-III shifts accordingly.  
28  
29  
30  
31  
32  
33  
34  
35  
36  
37  
38  
39  
40  
41  
42  
43  
44  
45  
46  
47  
48  
49  
50  
51  
52  
53  
54  
55  
56  
57  
58  
59  
60

## Acknowledgements

We thank NSHD study members for their lifelong participation and past and present members of the NSHD study team who helped to collect the data. We also thank ACE Mobile for providing a customized version of the ACE-III for NSHD.

## Funding

This study was supported by the UK Medical Research Council, which provides core funding for the NSHD, and supports the authors by MC\_UU\_12019/1 (Enhancing NSHD), and /3 (Mental Ageing). DD is additionally funded through a Wellcome Trust Intermediate Clinical Fellowship (WT107467). SNJ is additionally funded by Alzheimer's Research UK (ARUK-PG2014–1946, ARUK-PG2017-1946).

## Data Sharing

Bona fide researchers can apply to access the NSHD data via a standard application procedure (further details available at: <http://www.nshd.mrc.ac.uk/data.aspx>).

## Patient and Public Involvement

Participants have a lifelong association with NSHD. Over the 70 years of the study, the research team has increasingly involved participants, in line with changing norms about conducting cohort studies, starting at age 16 (in 1962) with the annual dissemination of study findings in birthday cards and this continues. Participants have always received a personal letter from the Director whenever they have raised queries or provided additional comments, including suggestions for new topics to study. In the last ten years, the research team has increased the level of participant involvement through invitations to study events and focus groups to discuss clinical sub-studies; and a new participant website ([www.nshd.mrc.ac.uk/study-members/](http://www.nshd.mrc.ac.uk/study-members/)) was developed in line with their feedback. When

1  
2  
3 piloting new questionnaires and assessments, we recruit patients from GP practices or from  
4  
5 the UCLH PPI and take into account their feedback when designing the mainstage fieldwork  
6  
7 for NSHD participants.  
8  
9

### 10 **Competing interests**

11  
12  
13 None disclosed.  
14  
15

16 Figure legend: Figure 1. Path model for the ACE-III total score  
17  
18  
19  
20  
21  
22  
23  
24  
25  
26  
27  
28  
29  
30  
31  
32  
33  
34  
35  
36  
37  
38  
39  
40  
41  
42  
43  
44  
45  
46  
47  
48  
49  
50  
51  
52  
53  
54  
55  
56  
57  
58  
59  
60

## REFERENCES

- 1 Kuh D, Wong A, Shah I, et al. The MRC National Survey of Health and Development reaches age 70: maintaining participation at older ages in a birth cohort study. *Eur J Epidemiol* 2016;31:1135–1147.
- 2 Richards M, Sacker A. Lifetime antecedents of cognitive reserve. *J Clin Exp Neuropsychol* 2003;25:614–624.
- 3 Deary IJ, Whiteman MC, Pattie A, et al. Cognitive change and the APOE epsilon 4 allele. *Nature* 2002;418:932. (erratum *Nature* 2002;419:450)
- 4 Hsieh S, Schubert S, Hoon C, et al. Validation of the Addenbrooke's Cognitive Examination III in frontotemporal dementia and Alzheimer's disease. *Dement Geriatr Cogn Disord* 2013;36:242–250.
- 5 Pigeon DA. Tests used in the 1954 and 1957 surveys. In: Douglas JWB ed. *The home and the school*. London: Macgibbon & Key 1964 appendix 1:129-132.
- 6 Nelson HE, Willison JR. *National Adult Reading Test (NART)*. 2<sup>nd</sup> ed. Windsor: NFER-Nelson 1991.
- 7 Muthén LK, Muthén BO. *Mplus. Statistical analysis with latent variables. User's guide*. Los Angeles, CA: Muthén and Muthén 2004.
- 8 Arbuckle JC. Full information estimation in the presence of incomplete data. In: Marcoulides GA, Schumacker RE eds. *Advanced Structural Equation Modeling Techniques*. Mahwah, NJ: Lawrence Erlbaum Associates, 1996:243-277.
- 9 Richards M, Power C, Sacker A. Paths to literacy and numeracy problems: evidence from two British birth cohorts. *J Epidemiol Community Health* 2009;63:239–244.
- 10 McGurn B, Starr JM, Topfer JA, et al. Pronunciation of irregular words is preserved in dementia, validating premorbid IQ estimation. *Neurology* 2004;62:1184–1186.

- 1  
2  
3 11 Xu MK, Jones PB, Barnett JH, et al. Adolescent self-organization predicts midlife  
4 memory in a prospective birth cohort study. *Psychology Aging* 2013;28:958–68.  
5  
6  
7 12 Plassman B, Welsh K, Helms M, et al. Intelligence and education as predictors of  
8 cognitive state in late life: A 50-year follow-up. *Neurology* 1995;45:1446–1450.  
9  
10  
11 13 Snowdon DA, Kemper SJ, Mortimer JA, et al. Linguistic ability in early life and  
12 cognitive function and Alzheimer’s disease in late life. Findings from the Nun Study.  
13 *JAMA* 1996;275:528–532.  
14  
15  
16 14 McGurn B, Deary IJ, Starr JM. Childhood cognitive ability and risk of late-onset  
17 Alzheimer and vascular dementia. *Neurology* 2008;71:1051–1056.  
18  
19  
20 15 Crawford JR, Deary IJ, Starr J, et al. The NART as an index of prior intellectual  
21 functioning: a retrospective validity study covering a 66-year interval. *Psychol Med*  
22 2001;31:451–458.  
23  
24  
25 16 Dykiert D, Der G, Starr JM, et al. Why is Mini-Mental state examination  
26 performance correlated with estimated premorbid cognitive ability? *Psychol Med*  
27 2016;46:2647–2654.  
28  
29  
30 17 Roselli R, Ardila A. The impact of culture and education on non-verbal  
31 neuropsychological measurements: A critical review. *Brain Cognition* 2003;52:326–  
32 333.  
33  
34  
35 18 Snow RE, Yalow E. Education and intelligence. In: Sternberg RJ, ed. Handbook of  
36 human intelligence. Cambridge, MA: Cambridge University Press, 1982:493-585.  
37  
38  
39 19 Clouston S, Kuh D, Herd P, et al. Benefits of educational attainment on adult fluid  
40 cognition: international evidence from three birth cohorts. *Int J Epidemiol*  
41 2012;41:1729–1736.  
42  
43  
44  
45  
46  
47  
48  
49  
50  
51  
52  
53  
54  
55  
56  
57  
58  
59  
60

- 1  
2  
3 20 Hatch SL, Feinstein L, Link B, et al. The continuing benefits of education: adult  
4 education and midlife cognitive ability in the British 1946 birth cohort. *J Gerontol*  
5 *Series B* 2007;62:S404–414.  
6  
7  
8  
9 21 Richards M, Hatch, SL. A life course approach to the development of mental skills.  
10 *Journal of Gerontology Series B* 2011;66:Suppl 1, i26–35.  
11  
12  
13 22 Poirier J, Davignon J, Bouthillier D, et al. Apolipoprotein E polymorphism and  
14 Alzheimer's disease. *Lancet* 1993;342:697–699.  
15  
16  
17 23 Jiang Q, Lee CY, Mandrekar S, et al. ApoE promotes the proteolytic degradation of  
18 A $\beta$ . *Neuron* 2008;58:681–693.  
19  
20  
21 24 Jorm AF, Mather KA, Butterworth P, et al. APOE genotype and cognitive  
22 functioning in a large age-stratified population sample. *Neuropsychology* 2007;21:1–  
23 8.  
24  
25  
26 25 Rawle M, Davis D, Bendayan B, et al. Apolipoprotein-E (APOE)  $\epsilon$ 4 and cognitive  
27 decline over the adult life course. *Transl Psychiat* 2018 Jan 10;8:18. doi:  
28 10.1038/s41398-017-0064-8.  
29  
30  
31 26 Caselli RJ, Dueck AC, Osborne D, et al. Longitudinal Modeling of Age-Related  
32 Memory Decline and the APOE  $\epsilon$ 4 Effect. *N Engl J Med* 2009;361:255–263.  
33  
34  
35 27 Wisdom NM, Callahan JL, Hawkins KA. The effects of apolipoprotein E on non-  
36 impaired cognitive functioning: a meta-analysis. *Neurobiol Aging* 2011;32:63–74.  
37  
38  
39 28 Alfred T, Ben-Shlomo Y, Cooper R, et al. Associations between APOE and low-  
40 density lipoprotein cholesterol genotypes and cognitive and physical capability: the  
41 HALCyon programme. *Age* 2014;36:9673.  
42  
43  
44 29 Bunce D, Bielak AA, Anstey KJ, et al. APOE genotype and cognitive change in  
45 young, middle-aged, and older adults living in the community. *J Gerontol A Biol Sci*  
46 *Med Sci* 2014;69:379–386.  
47  
48  
49  
50  
51  
52  
53  
54  
55  
56  
57  
58  
59  
60



- 1  
2  
3 30 Knight RG, Tsui HS, Abraham WC, et al. Lack of effect of the apolipoprotein E  
4 epsilon4 genotype on cognition during healthy aging. *J Clin Exp Neuropsychol*  
5 2014;36:742–750.  
6  
7  
8  
9 31 Farrer LA, Cupples LA, Haines JL, et al. Effects of age, sex, and ethnicity on the  
10 association between apolipoprotein E genotype and Alzheimer disease. A meta-  
11 analysis. APOE and Alzheimer Disease Meta Analysis Consortium. *JAMA*  
12 1997;278:1349–1356.  
13  
14  
15  
16  
17  
18  
19  
20  
21  
22  
23  
24  
25  
26  
27  
28  
29  
30  
31  
32  
33  
34  
35  
36  
37  
38  
39  
40  
41  
42  
43  
44  
45  
46  
47  
48  
49  
50  
51  
52  
53  
54  
55  
56  
57  
58  
59  
60

1  
2  
3  
4  
5  
6  
7  
8  
9  
10  
11  
12  
13  
14  
15  
16  
17  
18  
19  
20  
21  
22  
23  
24  
25  
26  
27  
28  
29  
30  
31  
32  
33  
34  
35  
36  
37  
38  
39  
40  
41  
42  
43  
44  
45  
46  
47  
48  
49  
50  
51  
52  
53  
54  
55  
56  
57  
58  
59  
60

For peer review only

1  
2  
3  
4  
5  
6  
7  
8  
9  
10  
11  
12  
13  
14  
15  
16  
17  
18  
19  
20  
21  
22  
23  
24  
25  
26  
27  
28  
29  
30  
31  
32  
33  
34  
35  
36  
37  
38  
39  
40  
41  
42  
43  
44  
45  
46  
47  
48  
49  
50  
51  
52  
53  
54  
55  
56  
57  
58  
59  
60

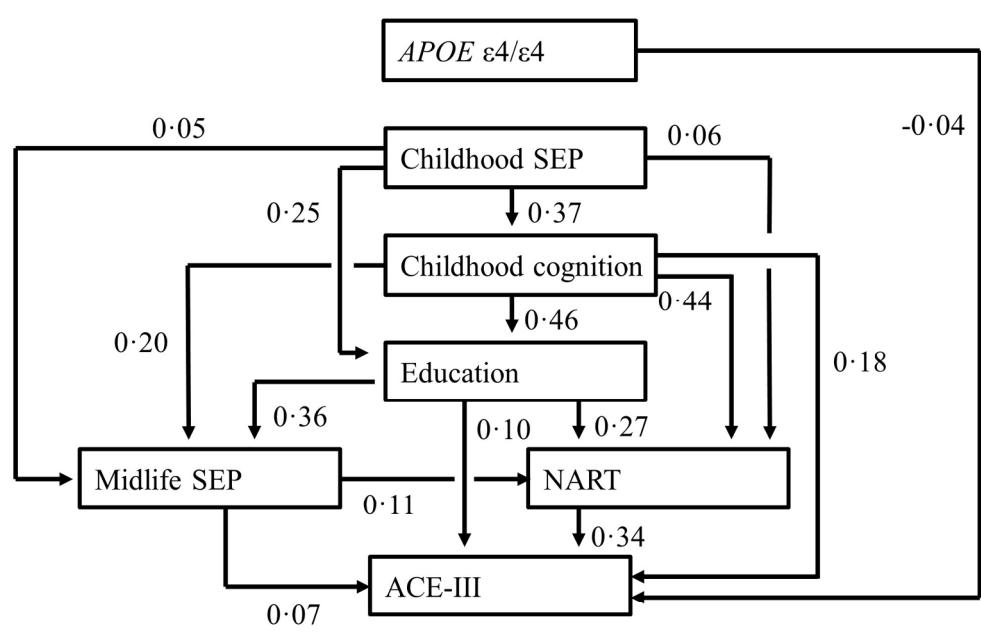

All paths are mutually independent; only those p<0.05 are shown

Path model for the ACE-III total score

170x119mm (300 x 300 DPI)

new only

# BMJ Open

## Identifying the lifetime cognitive and socioeconomic antecedents of cognitive state: seven decades of follow-up in a British birth cohort study.

|                                 |                                                                                                                                                                                                                                                                                                                                                                                                                                                                                                                                                                   |
|---------------------------------|-------------------------------------------------------------------------------------------------------------------------------------------------------------------------------------------------------------------------------------------------------------------------------------------------------------------------------------------------------------------------------------------------------------------------------------------------------------------------------------------------------------------------------------------------------------------|
| Journal:                        | <i>BMJ Open</i>                                                                                                                                                                                                                                                                                                                                                                                                                                                                                                                                                   |
| Manuscript ID                   | bmjopen-2018-024404.R1                                                                                                                                                                                                                                                                                                                                                                                                                                                                                                                                            |
| Article Type:                   | Research                                                                                                                                                                                                                                                                                                                                                                                                                                                                                                                                                          |
| Date Submitted by the Author:   | 04-Oct-2018                                                                                                                                                                                                                                                                                                                                                                                                                                                                                                                                                       |
| Complete List of Authors:       | Richards, M; UCL, MRC Unit for Lifelong Health and Ageing at UCL<br>James, Sarah-Naomi; MRC Unit for Lifelong Health and Ageing<br>Sizer, Alison; University College London, Epidemiology and Public Health<br>Sharma, Nikhil; MRC Unit for Lifelong Health and Ageing; University<br>College London Hospitals NHS Foundation Trust National Hospital for<br>Neurology and Neurosurgery<br>Rawle, Mark; MRC Unit for Lifelong Health and Ageing<br>Davis, Daniel; MRC Unit for Lifelong Health and Ageing<br>Kuh, Diana; MRC Unit for Lifelong Health and Ageing, |
| <b>Primary Subject Heading</b>: | Epidemiology                                                                                                                                                                                                                                                                                                                                                                                                                                                                                                                                                      |
| Secondary Subject Heading:      | Geriatric medicine                                                                                                                                                                                                                                                                                                                                                                                                                                                                                                                                                |
| Keywords:                       | EPIDEMIOLOGY, Dementia < NEUROLOGY, Old age psychiatry < PSYCHIATRY                                                                                                                                                                                                                                                                                                                                                                                                                                                                                               |
|                                 |                                                                                                                                                                                                                                                                                                                                                                                                                                                                                                                                                                   |

SCHOLARONE™  
Manuscripts

1  
2  
3 Identifying the lifetime cognitive and socioeconomic antecedents of cognitive state: seven  
4 decades of follow-up in a British birth cohort study  
5  
6

7  
8 Marcus Richards <sup>1</sup>, Sarah-Naomi James <sup>1</sup>, Alison Sizer <sup>2</sup>, Nikhil Sharma <sup>1,3</sup>, Mark James  
9  
10 Rawle <sup>1</sup>, Daniel Davis <sup>1</sup>, Diana Kuh <sup>1</sup>.  
11

12  
13 <sup>1</sup>MRC Unit for Lifelong Health and Ageing at UCL, 33 Bedford Place, London WC1B 5JU,  
14  
15 UK  
16

17  
18 <sup>2</sup>Department of Epidemiology and Public Health, University College London, 1-19  
19  
20 Torrington Place, London, WC1E 7HB, UK  
21  
22

23  
24 <sup>3</sup>National Hospital for Neurology and Neurosurgery, Queen Square, London WC1N 3BG,  
25  
26 UK  
27

28  
29 **Correspondence to** Professor Marcus Richards, MRC Unit for Lifelong Health and Ageing  
30 at UCL, 33 Bedford Place, London WC1B 5JU, UK; [m.richards@ucl.ac.uk](mailto:m.richards@ucl.ac.uk) tel. +44 (0)207  
31  
32 670 5710  
33  
34

35  
36  
37  
38 Word count

39  
40 Abstract: 266

41  
42 Main text: 3509  
43  
44

45  
46  
47 Contributorship statement

48  
49 MR conceived the work, conducted the statistical analyses and wrote the manuscript; SNJ  
50 advised on the path modelling; SNJ, AS, NS, MJR,, DD and DK contributed to interpretation  
51 and writing.  
52  
53  
54

## ABSTRACT

**Objectives** The life course determinants of midlife and later life cognitive function have been studied using longitudinal population-based cohort data, but far less is known about whether the pattern of these pathways is similar or distinct for clinically-relevant cognitive state. We investigated this for the Addenbrooke's Cognitive Examination (ACE-III), used in clinical settings to screen for cognitive impairment and dementia.

**Design** Longitudinal birth cohort study.

**Setting** Residential addresses in England, Wales and Scotland.

**Participants** 1762 community-dwelling men and women of European heritage, enrolled since birth in the MRC National Survey of Health and Development (the British 1946 birth cohort).

**Primary outcome** The Addenbrooke's Cognitive Examination (ACE-III).

**Results** Path modelling estimated direct and indirect associations between *APOE* status, father's social class, childhood cognition, education, midlife occupational complexity, midlife verbal ability (National Adult Reading Test; NART), and the total ACE-III score. Controlling for sex, there was a direct negative association between *APOE*  $\epsilon 4$  and the ACE-III score ( $\beta=-0.04$ , [-0.08, -0.002],  $p=0.04$ ), but not between *APOE*  $\epsilon 4$  and childhood cognition ( $\beta=0.03$  [-0.006, 0.69,  $p=0.10$ ] or the NART ( $\beta=0.0005$  [-0.03, 0.03],  $p=0.97$ ). The strongest influences on the ACE-III were from childhood cognition ( $\beta=0.20$  [0.14, 0.26],  $p<0.001$ ) and the NART ( $\beta=0.35$  [0.29, 0.41],  $p<0.001$ ); educational attainment and

1  
2  
3 occupational complexity were modestly and independently associated with the ACE-III  
4  
5 ( $\beta=0.08$  [0.03, 0.14],  $p=0.002$  and  $\beta=0.05$  [0.01, 0.10],  $p=0.02$ , respectively).  
6  
7

8 **Conclusions** The ACE-III in the general population shows a pattern of life course  
9  
10 antecedents that is similar to neuropsychological measures of cognitive function, and may be  
11  
12 utilised to represent normal cognitive ageing as well as a screen for cognitive impairment and  
13  
14 dementia.  
15

16  
17  
18  
19  
20  
21  
22  
23  
24  
25  
26  
27  
28  
29  
30  
31  
32  
33  
34  
35  
36  
37  
38  
39  
40  
41  
42  
43  
44  
45  
46  
47  
48  
49  
50  
51  
52  
53  
54  
55  
56  
57  
58  
59  
60

For peer review only

### Strengths and limitations of this study

- The MRC National Survey of Health and Development (the British 1946 birth cohort) is a large population-based sample with prospectively obtained information on socioeconomic status and educational attainment, and tested cognitive function from childhood
- The Addenbrooke's Cognitive Examination (ACE-III) is an extensive and comprehensive test of cognitive state.
- Path modelling used parameter estimates for incomplete data, thus minimising effects of missing predictor data
- The path structure of our model may be specific to cohort; NSHD is ethnically homogenous and experienced selective secondary education and high occupational mobility at labour market entry).
- Replication in more diverse populations is therefore required before our model can be considered generalisable



## INTRODUCTION

Using the MRC National Survey of Health and Development (NSHD; the British 1946 birth cohort)[1], we demonstrated multiple paths linking four fundamental developmental and social factors to midlife cognitive function: father's socioeconomic position (SEP), childhood cognitive ability, educational attainment, and own midlife SEP[2]. To our knowledge such a path model to understand key life course influences on cognitive state, as assessed in clinical practice, has not been undertaken. This is partly because the most frequently used tests, such as the Mini Mental Status Examination (MMSE) and Montreal Cognitive Assessment (MoCA), are brief and have pronounced ceiling effects. It would however be valuable to investigate whether life course paths to cognitive state show a similar pattern as those for other cognitive functions, which would inform theoretical understanding of, and methodology for, studies of cognitive ageing across the full population range. At the most recent NSHD wave at age 69, the Addenbrooke's Cognitive Examination 3<sup>rd</sup> edition (ACE-III) was administered. This is a more extensive and comprehensive test of cognitive state than the MMSE or MoCA, with a quasi-normal distribution. Using this outcome we estimated a path model incorporating childhood SEP, childhood cognitive ability, educational attainment and midlife occupational complexity, and adding two new paths. First, the National Adult Reading Test (NART), an outcome in the original path model, was now included as an intervening variable; we hypothesised that influences on cognitive state operate significantly through this test. Second, the apolipoprotein E (*APOE*) gene was included, the best known genetic risk factor for dementia; based on previous work[3] we hypothesised that the  $\epsilon 4$  allele of this gene would be negatively associated with the ACE-III score but not with childhood cognition.

## METHODS

### Participants

The NSHD is a representative sample of 5362 males and females born in England, Scotland, and Wales in one week in March 1946 (<http://www.nshd.mrc.ac.uk/nshd>). The 24th data collection was conducted between 2014 and 2015 when study members were aged 68-69 years[1]. At age 69 study members still alive and with a known current address in mainland Britain (n=2698) were invited to have a home visit by a trained nurse; 2149 (79.7%) completed a visit and a further 55 (2.0%) completed a postal questionnaire instead. Of the original cohort, 1026 (19.1%) had died, 578 (10.8%) were living abroad, 22 (0.4%) asked for their participation to be restricted to postal contacts, 621 (11.6%) had previously withdrawn from the study, and 417 (7.8%) had been lost to follow-up. For this data collection we obtained ethical approval from the NRES Queen Square REC (14/LO/1073), and Scotland A REC (14/SS/1009). All participants gave written informed consent to collect these data.

### Measures

Principal outcome: the ACE -III

The ACE-III is a screen-implemented test of cognitive state, and has been validated as a screening tool for cognitive deficits in Alzheimer's disease and frontotemporal dementia[4].

The ACE-III is divided into five domains: attention & orientation (scored 0-18), verbal fluency (0-14), memory (0-26), language (0-26), and visuospatial function (0-16). Thus the maximum total score is 100. Due to the inclusion of verbal fluency, the distribution of the total score is quasi-normal and avoids the pronounced ceiling effect of most cognitive state tests. A customised version of the ACE-III was administered by iPad using ACEMobile (<http://www.acemobile.org/>); where this was not possible, a paper version was used. All offline scoring was undertaken by trained personnel. Of the 2149 participants who had a

1  
2  
3 home visit, 32 refused or were unable to undertake the ACE-III. Of the remaining 21 17, 35  
4 undertook but did not complete this; and for the remaining 2082, data for 320 were lost  
5 through equipment failure. Thus complete ACE-III data were available for 1762 participants,  
6  
7 82.0% of those who received a home visit.  
8  
9  
10

### 11 12 13 Genetic risk

14  
15 Genetic risk was primarily represented by the *APOE*  $\epsilon$ 4 allele. Using blood taken at age 53 or  
16 69-71 by a research nurse, KBioscience analysed SNPs rs429358 and rs7412 to determine  
17  
18 *APOE* genotype. Distribution of alleles was as follows (n = 2686),  $\epsilon$ 2/ $\epsilon$ 2 n=20 (0.74%),  $\epsilon$ 2/ $\epsilon$ 3  
19 n=318 (11.84%),  $\epsilon$ 3/ $\epsilon$ 3 n=1538 (57.26%),  $\epsilon$ 2/ $\epsilon$ 4 n=68 (2.53%),  $\epsilon$ 3/ $\epsilon$ 4 n=657 (24.46%),  $\epsilon$ 4/ $\epsilon$ 4  
20 n=85 (3.16%). For analysis, *APOE* genotype was recoded categorically for the presence of  $\epsilon$ 4  
21  
22 alleles, with carriers of  $\epsilon$ 2 included as non *APOE*  $\epsilon$ 4 carriers. Because of difficulties in  
23  
24 interpreting potentially opposing effects on cognition, the 68 participants with  $\epsilon$ 2/ $\epsilon$ 4 were  
25  
26 excluded. Thus *APOE* was categorized as no  $\epsilon$ 4 vs. heterozygous  $\epsilon$ 4 or homozygous  $\epsilon$ 4. For  
27  
28 comparison with *APOE*, polygenic scores (PGS) for Alzheimer's disease were calculated for  
29  
30 2,768 participants using blood samples taken at age 53 and 60-64. Genotyping was carried  
31  
32 out on the NeuroX2 chip. PGSs were created using Allelic Scoring function in PLINK\_v1.9.  
33  
34 The base dataset used to calculate the PGS was the large, two-stage meta-analysis of genome-  
35  
36 wide association studies in individuals of European heritage conducted by the International  
37  
38 Genomics of Alzheimer's Project (IGAP)[5]. Linkage-disequilibrium parameters were set to  
39  
40  $r^2 > 0.2$  and a physical distance threshold for clumping SNPs set to 1Mb. The PGS included  
41  
42 the SNPs with a p-value in the I-GAP meta-analysis of  $p < 0.05$  (n= 31746).  
43  
44  
45  
46  
47  
48  
49

### 50 Early life SEP

51  
52 Early life SEP was assessed using father's occupational social class and mother's education,  
53  
54 which is associated with offspring cognition independently of father's occupation[6]. The  
55  
56  
57  
58  
59

1  
2  
3 former was classified when participants were aged 11 (or at 4 or 15 years if this was  
4 unknown) according to the UK Registrar General: professional, managerial, intermediate,  
5 skilled manual, semiskilled manual, unskilled; mother's education was coded as primary only  
6 vs. secondary or any formal qualifications.  
7  
8  
9  
10

### 11 12 13 Childhood cognitive function

14  
15 At 8 years participants took tests of verbal and nonverbal ability devised by the National  
16 Foundation for Educational Research[7], and administered by teachers or other trained  
17 personnel. These tests were: (1) reading comprehension (selecting appropriate words to  
18 complete 35 sentences), (2) word reading (ability to pronounce 50 words), (3) vocabulary  
19 (ability to explain the meaning of these 50 words), and (4) picture intelligence, consisting of a  
20 60-item nonverbal reasoning test. Scores for each test were standardized to the whole sample,  
21 then summed to create a total score representing overall cognitive ability at this age.  
22  
23  
24  
25  
26  
27  
28  
29  
30

### 31 32 33 Educational attainment

34  
35 The highest educational qualification achieved by 43 years was grouped into no qualification,  
36 below ordinary secondary qualifications (vocational), ordinary secondary qualifications ('O'  
37 levels and their training equivalents), advanced secondary qualifications ('A' levels and their  
38 equivalents), or higher qualifications (degree or equivalent).  
39  
40  
41  
42  
43  
44  
45

### 46 47 48 Midlife occupational complexity

49  
50 Midlife occupational complexity was represented by the National Statistics Socio-Economic  
51 Classification (NS-SEC) of the job held at age 53 or earlier if this was missing[8]. This  
52 provides a measure of employment relations and the conditions of employment, based on the  
53 Standard Occupational Classification (SOC): details of individual employment status (i.e.  
54  
55  
56  
57  
58  
59  
60

1  
2  
3 employer/ employee/ self-employed); supervisory position; and number of employees in the  
4 workplace. For NSHD information was available on the start and end dates of up to 27 jobs  
5 and their NS-SEC categories, which were recoded into 7 classes: 1. Higher managerial,  
6 administrative and professional occupations; 2. Lower managerial, administrative and  
7 professional occupations; 3. Intermediate occupations; 4. Small employers and own account  
8 workers; 5. Lower supervisory and technical occupations; 6. Semi-routine occupations; 7.  
9 Routine occupations.  
10  
11  
12  
13  
14  
15  
16  
17  
18  
19

## 20 The NART

21  
22 The NART assesses ability to pronounce 50 words of increasing difficulty[9]. These words  
23 violate conventional pronunciation rules, and are therefore unlikely to be read correctly  
24 unless the reader is familiar with them rather than relies on intelligent guesswork. Thus the  
25 NART serves as a measure of general (crystallised') cognitive ability.  
26  
27  
28  
29  
30  
31  
32

33 All measures were coded so that higher values signified higher status or function.  
34  
35  
36

## 37 **Statistical methods**

38  
39 All statistical analyses were conducted using STATA version 15[10]. Path modelling was  
40 used to quantify associations between each predictor variable and the ACE-III. Since each of  
41 the predictor variables are closely inter-related, the model also quantified their independent  
42 inter-associations. We hypothesized two key components within this model: 1. strong paths  
43 from childhood cognition and the NART to the ACE-III, with modest and weak additional  
44 contributions from education and midlife occupational complexity, respectively, and no  
45 direct path from childhood SEP[2]; 2. a direct negative path from APOE  $\epsilon$ 4 to the ACE-III  
46 but not via childhood cognition[3] or the NART. No directionality of association was  
47  
48  
49  
50  
51  
52  
53  
54  
55  
56  
57  
58  
59  
60

1  
2  
3 assumed between mother's education and father's social class, or between occupational  
4 complexity and the NART; these paths are therefore represented as correlational only. The  
5 path model was adjusted for gender, and incorporated full information maximum likelihood  
6 (FIML) parameter estimates to include those with item-missingness. FIML is preferable to  
7 estimation based on complete data, since FIML estimates tend to be less biased and more  
8 reliable than estimates based on list-wise deletion, even when the data deviate from missing  
9 at random and are non-ignorable[11]. Three criteria were used to assess model fit: 1. the  $\chi^2$   
10 test, although this can be overly sensitive to model misspecification when sample sizes are  
11 large; 2. the root mean square error of approximation (RMSEA), which gives a measure of  
12 the discrepancy in fit per degrees of freedom. It is bounded below by zero, only taking this  
13 value if the model fits exactly. If the RMSEA is  $< 0.05$ , the model is considered a close fit to  
14 the data; 3. the comparative fit index (CFI), whose values are restricted to a 0 to 1 continuum,  
15 with higher values indicating a better fit. CFI is normally tested against a minimum criterion  
16 value of 0.95.  
17  
18  
19  
20  
21  
22  
23  
24  
25  
26  
27  
28  
29  
30  
31  
32  
33  
34

### 35 **Patient and Public Involvement**

36  
37  
38 Participants have a lifelong association with NSHD. Over the 70 years of the study, the  
39 research team has increasingly involved participants, in line with changing norms about  
40 conducting cohort studies, starting at age 16 (in 1962) with the annual dissemination of study  
41 findings in birthday cards and this continues. Participants have always received a personal  
42 letter from the Director whenever they have raised queries or provided additional comments,  
43 including suggestions for new topics to study. In the last ten years, the research team has  
44 increased the level of participant involvement through invitations to study events and focus  
45 groups to discuss clinical sub-studies; and a new participant website  
46 (www.nshd.mrc.ac.uk/study-members/) was developed in line with their feedback. When  
47  
48  
49  
50  
51  
52  
53  
54  
55  
56  
57  
58  
59  
60

1  
2  
3 piloting new questionnaires and assessments, we recruit patients from GP practices or from  
4  
5 the UCLH PPI and take into account their feedback when designing the mainstage fieldwork  
6  
7 for NSHD participants.  
8  
9  
10

## 11 RESULTS

### 12 Descriptive

13  
14  
15  
16 As noted, sample size was 1762, the maximum N for the ACE-III. Those who were not  
17  
18 interviewed at age 69 for any reason showed no difference in *APOE*  $\epsilon$ 4 frequency ( $p=0.72$ )  
19  
20 but had lower childhood cognition and NART scores, and were more likely to be  
21  
22 disadvantaged in terms of father's social class, mother's education, own education and  
23  
24 occupational complexity (all  $p<0.001$ ). Those not interviewed were also previously shown to  
25  
26 have three or more clinical disorders at the previous assessment (age 60-64), a general health  
27  
28 self-rating as poor or fair rather than good, and a longstanding limiting illness, although the  
29  
30 latter was not associated with interview participation after controlling for socioeconomic and  
31  
32 cognitive characteristics[1]. Of those interviewed at age 69, there were no differences in any  
33  
34 of the path variables between those with and without ACE-III data, except for a slight trend  
35  
36 for the ACE-III to be missing in those with no educational qualifications ( $\chi^2=9.5$ ,  $p=0.05$ ).  
37  
38 Frequencies for each category of *APOE* group, childhood and midlife SEP and educational  
39  
40 attainment, and means and SDs for the ACE-III and NART, are shown in Table 1.  
41  
42  
43  
44  
45  
46

47 **Table 1** Frequency distributions for *APOE* group, childhood and midlife SEP, educational  
48 attainment, and mean NART and ACE-III scores (for 1762 participants with ACE-III data)  
49  
50

---

51  
52  
53  
54 Variable N % N %  
55  
56  
57  
58  
59  
60

---

*APOE*

|                           |      |        |
|---------------------------|------|--------|
| No $\epsilon$ 4           | 1076 | (61.1) |
| Heterozygous $\epsilon$ 4 | 388  | (21.0) |
| Homozygous $\epsilon$ 4   | 48   | (2.7)  |
| Missing                   | 250  | (14.2) |

## Father's social class

|                |     |        |
|----------------|-----|--------|
| Professional   | 134 | (7.6)  |
| Managerial     | 372 | (21.1) |
| Intermediate   | 296 | (16.8) |
| Skilled manual | 519 | (29.4) |
| Semiskilled    | 271 | (15.4) |
| Unskilled      | 79  | (4.5)  |
| Missing        | 91  | (5.2)  |

## Mother's education

|                                           |      |        |
|-------------------------------------------|------|--------|
| Primary only                              | 1151 | (65.3) |
| Secondary or any<br>formal qualifications | 421  | (23.9) |
| Missing                                   | 611  | (10.8) |

## Educational attainment (by age 43)

|                   |     |        |
|-------------------|-----|--------|
| No qualifications | 403 | (22.9) |
| Vocational only   | 235 | (13.3) |



|                      |      |        |
|----------------------|------|--------|
| Ordinary ('O') level | 340  | (19.3) |
| Advanced ('A') level | 497  | (28.2) |
| Higher               | 2.73 | (15.5) |
| Missing              | 14   | (0.8)  |

NSSEC occupation (by age 53)\*

|         |     |        |
|---------|-----|--------|
| 1.      | 221 | (12.5) |
| 2.      | 504 | (28.6) |
| 3.      | 307 | (17.4) |
| 4.      | 200 | (11.4) |
| 5.      | 120 | (6.8)  |
| 6.      | 228 | (12.9) |
| 7.      | 154 | (8.7)  |
| Missing | 28  | (1.6)  |

Mean (SE)

|         |       |        |
|---------|-------|--------|
| NART    | 35.6  | (0.22) |
| ACE-III | 91.52 | (0.14) |

---

\*1. Higher managerial, administrative and professional occupations; 2. Lower managerial, administrative and professional occupations; 3. Intermediate occupations; 4. Small employers and own account workers; 5. Lower supervisory and technical occupations; 6. Semi-routine occupations; 7. Routine occupations.

### Path model

Figure 1 shows the path model. All paths are mutually adjusted. Goodness of fit statistics indicated that the model was an excellent representation of the data ( $\chi^2=0.15$ ,  $p=1.0$  for analytic vs. saturated model; RMSEA=0,  $p=1.0$ ; CFI = 1.0). Gender effects and all non-significant paths ( $P$  value  $>.05$ ) are not shown.

[Figure 1 about here]

The strongest influences on the ACE-III score were from the NART, and from childhood cognition, which was mainly associated with the ACE-III via educational attainment and the NART, but also directly with the ACE-III. The influence of midlife occupational complexity was more modest, and was itself part-mediated by the NART. There was no direct path from father's social class or mother's education to the ACE-III, but these had independent associations with childhood cognition, educational attainment and midlife occupational complexity, in descending order of magnitude. *APOE*  $\epsilon 4$  showed a modest direct negative association with the ACE-III score, but was not associated with childhood cognition or the NART. When the model was re-run replacing *APOE* with the PGS, the path to the ACE-III was of negligible magnitude ( $\beta=0.004$  95% CI -0.031, 0.038,  $p=0.82$ ). The paths from the latter to childhood cognition and the ACE-III were also nonsignificant ( $\beta = -.02$ , 95% CI -0.05, 0.019,  $p = 0.35$ ;  $\beta = 0.002$ , 95% CI -0.04, 0.04,  $p = 0.9$ , respectively). However, the path from PGS to NART was significantly negative ( $\beta = -0.03$ , 95% CI -0.06, -0.004,  $p = 0.03$ ).

When the model was re-run on the ACE-III sub-scales, *APOE*  $\epsilon 4$  was associated with Attention and Memory, with a similar magnitude to that of the total score (Supplementary Table 1); this reached 5% significance when these two scales were combined. Associations between *APOE*  $\epsilon 4$  and the Language, Fluency and Visuospatial scales were negligible.

1  
2  
3 Childhood cognition was significantly associated with Attention, Memory and Fluency  
4 (negatively in the case of the latter, even though other variables were associated in the  
5 expected direction), but not Language or Visuospatial. Education, occupational complexity  
6 and the NART were associated with Fluency, Memory and Visuospatial to varying degrees,  
7 but none of these were significantly associated with Attention, and only occupational  
8 complexity was associated with Language (Supplementary Table 1).  
9  
10  
11  
12  
13  
14  
15  
16  
17

## 18 **DISCUSSION**

19  
20  
21 In the NSHD we estimated a path model describing key life course influences on cognitive  
22 state using the Addenbrooke's cognitive examination (ACE-III). Confirming our main study  
23 hypothesis, by far the strongest influence on this outcome was from lifetime cognition, most  
24 strongly from general cognitive ability in midlife, assessed by the NART. The NART in turn  
25 was particularly influenced by childhood cognition. To a lesser extent educational attainment  
26 was positively associated with the ACE-III, independently of childhood cognition, although  
27 the model suggests that this was part-mediated by the NART. Occupational complexity  
28 showed more modest effects still, and there were no direct associations between either  
29 measure of childhood SEP (mother's education and father's occupational social class) and the  
30 ACE-III, although these latter variables were associated with the intervening variables with  
31 magnitudes directly proportional to proximity. Finally, there was a direct negative association  
32 between the *APOE*  $\epsilon 4$  allele and the ACE-III;  $\epsilon 4$  was not associated with childhood cognitive  
33 function, nor with the NART. The pattern of associations for parental SEP, childhood  
34 cognition and education broadly reflect those previously shown in this cohort when the  
35 NART was an outcome rather than a predictor[2], even with an important genetic influence  
36 on cognitive function (*APOE*  $\epsilon 4$ ) controlled. However, it is notable that, with the NART  
37 controlled, childhood cognition, education and midlife SEP additionally showed direct  
38  
39  
40  
41  
42  
43  
44  
45  
46  
47  
48  
49  
50  
51  
52  
53  
54  
55  
56  
57  
58  
59  
60

1  
2  
3 associations with the ACE-III, with childhood cognition having the strongest effect, and  
4  
5 midlife SEP the weakest.  
6

7  
8 Major strengths of this study are: 1. the use of a large representative population-based birth  
9  
10 cohort; 2. an extensive and comprehensive measure of cognitive state (ACE-III) as an  
11  
12 outcome; 3. prospective measures across the life course, including tested childhood  
13  
14 cognition, which enabled a comprehensive prospective life course model of mental state; 4.  
15  
16 path modelling that uses FIML parameter estimates for incomplete data, thus minimizing  
17  
18 effects of missing predictor data. Against these strengths we should note the disproportionate  
19  
20 loss to follow-up in those less socially advantaged, with lower prior cognitive function, and  
21  
22 with higher physical morbidity. Also, the path structure of our model may be specific to the  
23  
24 cohort (NSHD is ethnically homogenous) and period (NSHD experienced selective  
25  
26 secondary education and high occupational mobility at labor market entry). While our  
27  
28 previous work suggests a broadly robust path structure in the face of social change[12],  
29  
30 replication in more diverse populations is required before our model can be considered  
31  
32 generalizable.  
33  
34

35  
36  
37 Our path model suggests that cognitive state has a prominent general cognitive ability  
38  
39 component, which in turn has cognitive antecedents extending back into childhood. It might  
40  
41 be argued that the influence of the NART is a matter of circularity, reflecting the dominance  
42  
43 of verbal-based tests within the ACE-III (accounting for 84% of the total score). However,  
44  
45 the NART also correlates with non-verbal skills[9]. The most obvious difference between the  
46  
47 NART and the ACE-III is that the constituent tests of the latter are ‘fluid’ measures, sensitive  
48  
49 to age and morbidity-associated decline; whereas the former, as a measure of ‘crystallized’  
50  
51 ability, is stable even in the face of mild dementia[13]. Further follow-up will determine  
52  
53 whether the cognitive paths within our model retain their magnitude and pattern as the ACE-  
54  
55 III scores change over time.  
56  
57

1  
2  
3 In regard to the long-term cognitive antecedents of the ACE-III, the present study extends our  
4 previous studies showing that childhood cognition tracks across the life course even when  
5 education, lifetime socioeconomic position[2] and adolescent mental health[14] are  
6 controlled. This tracking is also consistent with earlier studies in relation to cognitive  
7 ageing[15] and risk of dementia[16,17]; and with studies showing that associations between  
8 tests of mental state and verbal cognitive ability are strongly explained by childhood  
9 cognitive function[18,19]. We also observed an additional direct association between  
10 childhood cognition and the ACE-III that was independent of the NART as well as other  
11 factors in the model. This is probably because the measures of childhood cognition capture a  
12 wider range of function than the NART, including nonverbal reasoning, even though, as  
13 noted, the NART itself predicts a comprehensive range of cognitive function[9].

14  
15  
16  
17  
18  
19  
20  
21  
22  
23  
24  
25  
26  
27 The next most prominent influence on the ACE-III was from educational attainment, which  
28 was primarily based on qualifications through formal education, but also captured  
29 qualifications achieved up to early midlife, whether through job training or other paths  
30 through adult education. This was associated with the ACE-III even when childhood  
31 cognition was controlled. As with childhood cognition itself, the influence of education was  
32 largely through the NART, although again there was a modest independent association with  
33 the ACE-III, since education also shapes non-verbal cognitive skills[20]. An association  
34 between education and subsequent cognition independent of childhood cognition has long  
35 been observed[21]; has been replicated in two other birth cohorts[22]; is shown in NSHD to  
36 be additive with respect to adult education[23]; and responds rapidly to policy[12]. By way of  
37 interpretation, it is important to note that education is not just a process of 'cognitive  
38 stimulation'. Schools indeed teach specific knowledge, but can also teach practical skills,  
39 including how to approach cognitive testing, refine other cognitive skills, and shape non-  
40 cognitive skills that are likely to have long-term benefit to cognitive function[24,14]. Policies  
41  
42  
43  
44  
45  
46  
47  
48  
49  
50  
51  
52  
53  
54  
55  
56  
57  
58  
59  
60

1  
2  
3 to improve access to education, and widen educational curricula to strengthen all these skills,  
4  
5 are likely to have long-term benefits to cognitive ageing, and risk of dementia.  
6  
7

8 Finally, we should consider the role of *APOE* in the model. This is involved in the transport  
9  
10 of cholesterol and other lipids between cellular structures, and  $\epsilon 4$  has a higher rate of  
11  
12 lipoprotein clearance thus altering its bioavailability[25]. *APOE* is also involved in clearing  
13  
14 beta amyloid from the brain, and  $\epsilon 4$  may be less efficient at this[26]. A direct association  
15  
16 between the  $\epsilon 4$  allele and the ACE-III was found in our model; this was of relatively weak  
17  
18 magnitude, was only observed in homozygotes, and was not observed with any other variable  
19  
20 in the model including prior cognitive function. These findings are consistent with evidence  
21  
22 that  $\epsilon 4$  zygosity shows a dose-response for Alzheimer's disease[27]; with a study showing no  
23  
24 association with childhood cognition although observed in old age in the same cohort[3]; and  
25  
26 with parallel evidence from NSHD that decline in verbal memory from age 43 to 69 is faster  
27  
28 in *APOE* homozygosity[28]. There is no consensus over whether *APOE* is associated with  
29  
30 normal cognitive ageing as opposed to clinical decline[3,27-33]. However, this may be age-  
31  
32 dependent[30]; intriguingly, while no association was found between  $\epsilon 4$  and fluid cognitive  
33  
34 measures in NSHD at age 53[28,31], this association is now evident 16 years later, albeit  
35  
36 modestly. In regard to cognitive domain, it is interesting to note the finding that *APOE*  $\epsilon 4$   
37  
38 was associated with attention and memory in particular. This is a potentially important  
39  
40 finding since three of five neuropsychological tests identified by a meta-analysis as having  
41  
42 the highest predictive accuracy for progression from mild cognitive impairment to  
43  
44 Alzheimer's disease were of episodic memory[34]. It should also be highlighted that the  
45  
46 presence of *APOE* in the model means that the structure and magnitude of the pathways,  
47  
48 including those between parental social class and childhood cognition, were independent of  
49  
50 this. Adding *APOE* does not of course comprehensively control for genetic influence on  
51  
52  
53  
54  
55  
56  
57  
58  
59  
60

1  
2  
3 cognitive ageing. However, the  $\epsilon 4$  allele of this gene is the best-known genetic risk factor for  
4  
5 clinically significant cognitive decline[35].  
6

7  
8 In contrast to *APOE*  $\epsilon 4$ , a polygenic score for AD was associated with a lower NART score,  
9  
10 this was not associated with the ACE-III, although scores based on the same IGAP database  
11  
12 used as a reference for the PRS in this study are predictive of AD itself[36]. The lack of  
13  
14 association between a PGS for AD and general cognitive ability is consistent with a recent  
15  
16 study using the Lothian birth cohort[37], although these authors found an association for  
17  
18 cognitive slope (but not intercept) with a more stringent whole-genome threshold (0.01) than  
19  
20 ours (0.05). They suggest that SNPs unrelated to *APOE*  $\epsilon 4$  may be overpowering the signal  
21  
22 from this; indeed, a systematic analysis of the GenAge database found *APOE* to be one of the  
23  
24 top 3 genes associated with the greatest number of age-related diseases[38].  
25  
26

27  
28 In conclusion, the ACE-III in the general ageing population shows a pattern of life course  
29  
30 antecedents that is similar to neuropsychological measures of cognitive function. This may  
31  
32 not have emerged from studies using briefer tests of cognitive state such as the MMSE, since  
33  
34 most of these have ceiling effects outside the clinical context that limit their use as  
35  
36 continuous measures. As noted, continuing follow-up of NSHD will elucidate whether the  
37  
38 path structure we describe here changes as an increasing number of participants meet clinical  
39  
40 criteria for dementia, and the distribution of the ACE-III shifts accordingly.  
41  
42

#### 43 44 **Acknowledgements**

45  
46  
47 We thank NSHD study members for their lifelong participation and past and present  
48  
49 members of the NSHD study team who helped to collect the data. We also thank ACE  
50  
51 Mobile for providing a customized version of the ACE-III for NSHD.  
52  
53  
54  
55  
56  
57  
58  
59  
60

## Funding

This study was supported by the UK Medical Research Council, which provides core funding for the NSHD, and supports the authors by MC\_UU\_12019/1 (Enhancing NSHD), and /3 (Mental Ageing). DD is additionally funded through a Wellcome Trust Intermediate Clinical Fellowship (WT107467). SNJ is additionally funded by Alzheimer's Research UK (ARUK-PG2014-1946, ARUK-PG2017-1946).

## Data Sharing

Bona fide researchers can apply to access the NSHD data via a standard application procedure (further details available at: <http://www.nshd.mrc.ac.uk/data.aspx>).

## Competing interests

None disclosed.

Figure legend: Figure 1. Path model for the ACE-III total score



## REFERENCES

- 1 Kuh D, Wong A, Shah I, et al. The MRC National Survey of Health and Development reaches age 70: maintaining participation at older ages in a birth cohort study. *Eur J Epidemiol* 2016;31:1135–1147.
- 2 Richards M, Sacker A. Lifetime antecedents of cognitive reserve. *J Clin Exp Neuropsychol* 2003;25:614–624.
- 3 Deary IJ, Whiteman MC, Pattie A, et al. Cognitive change and the APOE epsilon 4 allele. *Nature* 2002;418:932. (erratum *Nature* 2002;419:450)
- 4 Hsieh S, Schubert S, Hoon C, et al. Validation of the Addenbrooke's Cognitive Examination III in frontotemporal dementia and Alzheimer's disease. *Dement Geriatr Cogn Disord* 2013;36:242–250.
- 5 Lambert JC, Ibrahim-Verbaas CA, Harold D, et al. Meta-analysis of 74,046 individuals identifies 11 new susceptibility loci for Alzheimer's disease. *Nat Genet* 2013;45:1452-8.
- 6 Kaplan GA, Turrell G, Lynch JW, Everson SA, Helkala EL, Salonen JT. Childhood socioeconomic position and cognitive function in adulthood. *Int J Epidemiol* 2001;30:256-63.
- 7 Pigeon DA. Tests used in the 1954 and 1957 surveys. In: Douglas JWB ed. *The home and the school*. London: Macgibbon & Key 1964 appendix 1:129-132.
- 8 ONS. 2014. The National Statistics Socio-economic Classification (NS-SEC rebased on the SOC2010) [Online]. Newport, Wales: Office for National Statistics. Available: <http://www.ons.gov.uk/ons/guide-method/classifications/current-standard-classifications/soc2010/soc2010-volume-3-ns-sec--rebased-on-soc2010--user-manual/index.html>.

- 1  
2  
3 9 Nelson HE, Willison JR. National Adult Reading Test (NART). 2<sup>nd</sup> ed. Windsor:  
4 NFER-Nelson 1991.  
5  
6  
7 10 *StataCorp*. 2017. Stata Statistical Software: Release 15. College Station, TX:  
8 StataCorp LLC  
9  
10  
11 11 Arbuckle JC. Full information estimation in the presence of incomplete data. In:  
12 Marcoulides GA, Schumacker RE eds. *Advanced Structural Equation Modeling*  
13 *Techniques*. Mahwah, NJ: Lawrence Erlbaum Associates, 1996:243-277.  
14  
15  
16 12 Richards M, Power C, Sacker A. Paths to literacy and numeracy problems: evidence  
17 from two British birth cohorts. *J Epidemiol Community Health* 2009;63:239–244.  
18  
19  
20 13 McGurn B, Starr JM, Topfer JA, et al. Pronunciation of irregular words is preserved  
21 in dementia, validating premorbid IQ estimation. *Neurology* 2004;62:1184–1186.  
22  
23  
24 14 Xu MK, Jones PB, Barnett JH, et al. Adolescent self-organization predicts midlife  
25 memory in a prospective birth cohort study. *Psychology Aging* 2013;28:958–68.  
26  
27  
28 15 Plassman B, Welsh K, Helms M, et al. Intelligence and education as predictors of  
29 cognitive state in late life: A 50-year follow-up. *Neurology* 1995;45:1446–1450.  
30  
31  
32 16 Snowdon DA, Kemper SJ, Mortimer JA, et al. Linguistic ability in early life and  
33 cognitive function and Alzheimer’s disease in late life. Findings from the Nun Study.  
34 *JAMA* 1996;275:528–532.  
35  
36  
37 17 McGurn B, Deary IJ, Starr JM. Childhood cognitive ability and risk of late-onset  
38 Alzheimer and vascular dementia. *Neurology* 2008;71:1051–1056.  
39  
40  
41 18 Crawford JR, Deary IJ, Starr J, et al. The NART as an index of prior intellectual  
42 functioning: a retrospective validity study covering a 66-year interval. *Psychol Med*  
43 2001;31:451–458.  
44  
45  
46  
47  
48  
49  
50  
51  
52  
53  
54  
55  
56  
57  
58  
59  
60

- 1  
2  
3 19 Dykiert D, Der G, Starr JM, et al. Why is Mini-Mental state examination  
4 performance correlated with estimated premorbid cognitive ability? *Psychol Med*  
5 2016;46:2647–2654.  
6  
7  
8  
9 20 Roselli R, Ardila A. The impact of culture and education on non-verbal  
10 neuropsychological measurements: A critical review. *Brain Cognition* 2003;52:326–  
11 333.  
12  
13  
14  
15 21 Snow RE, Yalow E. Education and intelligence. In: Sternberg RJ, ed. Handbook of  
16 human intelligence. Cambridge, MA: Cambridge University Press, 1982:493-585.  
17  
18  
19 22 Clouston S, Kuh D, Herd P, et al. Benefits of educational attainment on adult fluid  
20 cognition: international evidence from three birth cohorts. *Int J Epidemiol*  
21 2012;41:1729–1736.  
22  
23  
24  
25 23 Hatch SL, Feinstein L, Link B, et al. The continuing benefits of education: adult  
26 education and midlife cognitive ability in the British 1946 birth cohort. *J Gerontol*  
27 *Series B* 2007;62:S404–414.  
28  
29  
30  
31 24 Richards M, Hatch, SL. A life course approach to the development of mental skills.  
32 *Journal of Gerontology Series B* 2011;66:Suppl 1, i26–35.  
33  
34  
35  
36 25 Poirier J, Davignon J, Bouthillier D, et al. Apolipoprotein E polymorphism and  
37 Alzheimer's disease. *Lancet* 1993;342:697–699.  
38  
39  
40  
41 26 Jiang Q, Lee CY, Mandrekar S, et al. ApoE promotes the proteolytic degradation of  
42 A $\beta$ . *Neuron* 2008;58:681–693.  
43  
44  
45  
46 27 Jorm AF, Mather KA, Butterworth P, et al. APOE genotype and cognitive  
47 functioning in a large age-stratified population sample. *Neuropsychology* 2007;21:1–  
48 8.  
49  
50  
51  
52  
53  
54  
55  
56  
57  
58  
59  
60

- 1  
2  
3 28 Rawle M, Davis D, Bendayan B, et al. Apolipoprotein-E (APOE) ε4 and cognitive  
4 decline over the adult life course. *Transl Psychiat* 2018 Jan 10;8:18. doi:  
5  
6 10.1038/s41398-017-0064-8.  
7  
8  
9  
10 29 Caselli RJ, Dueck AC, Osborne D, et al. Longitudinal Modeling of Age-Related  
11 Memory Decline and the APOE ε4 Effect. *N Engl J Med* 2009;361:255–263.  
12  
13 30 Wisdom NM, Callahan JL, Hawkins KA. The effects of apolipoprotein E on non-  
14 impaired cognitive functioning: a meta-analysis. *Neurobiol Aging* 2011;32:63–74.  
15  
16 31 Alfred T, Ben-Shlomo Y, Cooper R, et al. Associations between APOE and low-  
17 density lipoprotein cholesterol genotypes and cognitive and physical capability: the  
18 HALCyon programme. *Age* 2014;36:9673.  
19  
20 32 Bunce D, Bielak AA, Anstey KJ, et al. APOE genotype and cognitive change in  
21 young, middle-aged, and older adults living in the community. *J Gerontol A Biol Sci*  
22 *Med Sci* 2014;69:379–386.  
23  
24 33 Knight RG, Tsui HS, Abraham WC, et al. Lack of effect of the apolipoprotein E  
25 epsilon4 genotype on cognition during healthy aging. *J Clin Exp Neuropsychol*  
26 2014;36:742–750.  
27  
28 34 Belleville S, Fouquet C, Hudon C, Zomahoun HTV, Consortium for the Early  
29 Identification of Alzheimer's disease-Quebec. Neuropsychological measures that  
30 predict progression from mild cognitive impairment to Alzheimer's type dementia in  
31 older adults: a systematic review and meta-analysis. *Neuropsychol Rev* 2017;27:328-  
32 353.  
33  
34 35 Farrer LA, Cupples LA, Haines JL, et al. Effects of age, sex, and ethnicity on the  
35 association between apolipoprotein E genotype and Alzheimer disease. A meta-  
36 analysis. APOE and Alzheimer Disease Meta Analysis Consortium. *JAMA*  
37 1997;278:1349–1356.  
38  
39  
40  
41  
42  
43  
44  
45  
46  
47  
48  
49  
50  
51  
52  
53  
54  
55  
56  
57  
58  
59  
60

- 1  
2  
3 36 Escott-Price V, Sims R, Bannister C, et al. Common polygenic variation enhances  
4 risk prediction for Alzheimer's disease. *Brain* 2015;138:3673–3684.  
5  
6  
7  
8 37 Ritchie S, David Hill W, Riccardo E. Marioni RE, et al. Polygenic predictors of age-  
9 related decline in cognitive ability. *bioRxiv* Jul. 24, 2018;doi:  
10 http://dx.doi.org/10.1101/375691.  
11  
12  
13  
14  
15 38 Fernandes M, Wan C, Tacutu R, et al. Systematic analysis of the gerontome reveals  
16 links between aging and age-related diseases. *Hum Mol Genet* 2016;25:4804-4818.  
17  
18  
19  
20  
21  
22  
23  
24  
25  
26  
27  
28  
29  
30  
31  
32  
33  
34  
35  
36  
37  
38  
39  
40  
41  
42  
43  
44  
45  
46  
47  
48  
49  
50  
51  
52  
53  
54  
55  
56  
57  
58  
59  
60

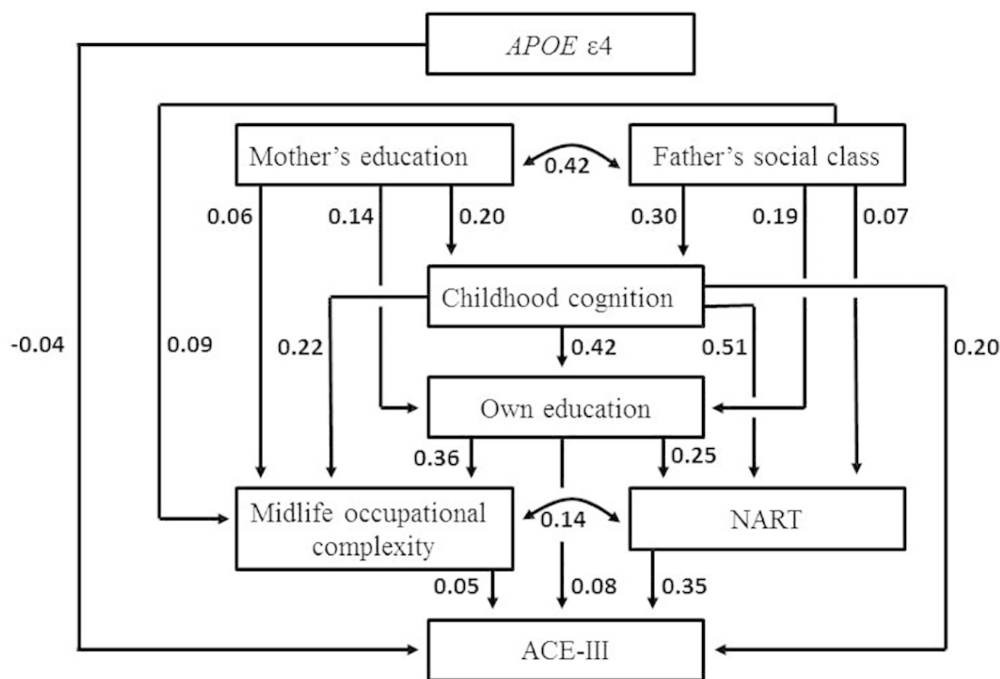

All paths are mutually independent; only those  $p < 0.05$  are shown

90x90mm (300 x 300 DPI)

**Supplementary Table 1** Associations between path variables and each ACE-III subscale:  $\beta$  (95% confidence intervals)

|                            | Attention            | Memory               | Language            | Fluency                 | Visuospatial         |
|----------------------------|----------------------|----------------------|---------------------|-------------------------|----------------------|
| <i>APOE</i> $\epsilon 4^1$ | -0.05 (-0.1, 0.003)  | -0.03 (-0.08, 0.01)  | 0.009 (-0.05, 0.06) | 0.0003 (-0.04, 0.04)    | 0.003 (-0.05, 0.06)  |
| Father's social class      | -0.02 (-0.08, 0.03)  | 0.04 (-0.01, 0.09)   | 0.04 (-0.02, 0.09)  | 0.02 (-0.02, 0.05)*     | 0.04 (-0.02, 0.09)   |
| Mother's education         | 0.04 (-0.01, 0.09)   | 0.01 (-0.03, 0.06)   | -0.02 (-0.07, 0.03) | -0.007 (-0.04, 0.03)    | -0.02 (-0.07, 0.04)  |
| Childhood cognition        | 0.12 (0.05, 0.20)*** | 0.10 (0.04, 0.17)*** | -0.01, -0.08, 0.06) | -0.09 (-0.13, -0.04)*** | -0.008 (-0.08, 0.06) |
| Education                  | 0.05 (-0.01, 0.12)   | 0.07 (0.02, 0.13)*   | 0.05 (-0.01, 0.12)  | 0.09 (0.05, 0.13)***    | 0.06 (-0.001, 0.13)  |
| NART                       | 0.04 (-0.03, 0.11)   | 0.30 (0.23, 0.36)*** | 0.06 (-0.02, 0.14)  | 0.19 (0.14, 0.25)***    | 0.04 (-0.04, 0.12)   |
| Occupational complexity    | 0.01 (-0.04, 0.07)   | 0.05 (0.001, 0.10)*  | 0.06 (0.005, 0.12)* | 0.08 (0.05, 0.12)***    | 0.06 (0.004, 0.12)*  |

<sup>1</sup> -0.05 (-0.09, -0.002),  $p = 0.04$  for combined Attention and Memory

\*  $p < 0.05$ , \*\*\*  $p < 0.001$

**STROBE 2007 (v4) Statement—Checklist of items that should be included in reports of *cohort studies*****Checklist completed for: Developmental and adult risk factors associated with decline in grip strength from midlife to old age: a British birth cohort study**

| Section/Topic                | Item # | Recommendation                                                                                                                                                                       | Reported on page # |
|------------------------------|--------|--------------------------------------------------------------------------------------------------------------------------------------------------------------------------------------|--------------------|
| Title and abstract           | 1      | (a) Indicate the study's design with a commonly used term in the title or the abstract                                                                                               | Title & abstract   |
|                              |        | (b) Provide in the abstract an informative and balanced summary of what was done and what was found                                                                                  | 2                  |
| <b>Introduction</b>          |        |                                                                                                                                                                                      |                    |
| Background/rationale         | 2      | Explain the scientific background and rationale for the investigation being reported                                                                                                 | 4-5                |
| Objectives                   | 3      | State specific objectives, including any prespecified hypotheses                                                                                                                     | 5                  |
| <b>Methods</b>               |        |                                                                                                                                                                                      |                    |
| Study design                 | 4      | Present key elements of study design early in the paper                                                                                                                              | 5-7                |
| Setting                      | 5      | Describe the setting, locations, and relevant dates, including periods of recruitment, exposure, follow-up, and data collection                                                      | 5-7                |
| Participants                 | 6      | (a) Give the eligibility criteria, and the sources and methods of selection of participants. Describe methods of follow-up                                                           | 5-7                |
|                              |        | (b) For matched studies, give matching criteria and number of exposed and unexposed                                                                                                  | n/a                |
| Variables                    | 7      | Clearly define all outcomes, exposures, predictors, potential confounders, and effect modifiers. Give diagnostic criteria, if applicable                                             | 6-7                |
| Data sources/<br>measurement | 8*     | For each variable of interest, give sources of data and details of methods of assessment (measurement). Describe comparability of assessment methods if there is more than one group | 6-7                |
| Bias                         | 9      | Describe any efforts to address potential sources of bias                                                                                                                            | 9                  |
| Study size                   | 10     | Explain how the study size was arrived at                                                                                                                                            | 5                  |
| Quantitative variables       | 11     | Explain how quantitative variables were handled in the analyses. If applicable, describe which groupings were chosen and why                                                         | 6-7, 8-9           |
| Statistical methods          | 12     | (a) Describe all statistical methods, including those used to control for confounding                                                                                                | 8-9                |
|                              |        | (b) Describe any methods used to examine subgroups and interactions                                                                                                                  | 8-9                |
|                              |        | (c) Explain how missing data were addressed                                                                                                                                          | 6-7,9              |
|                              |        | (d) If applicable, explain how loss to follow-up was addressed                                                                                                                       | 9                  |
|                              |        | (e) Describe any sensitivity analyses                                                                                                                                                | 9                  |



| <b>Results</b>           |     |                                                                                                                                                                                                              |                     |
|--------------------------|-----|--------------------------------------------------------------------------------------------------------------------------------------------------------------------------------------------------------------|---------------------|
| Participants             | 13* | (a) Report numbers of individuals at each stage of study—eg numbers potentially eligible, examined for eligibility, confirmed eligible, included in the study, completing follow-up, and analysed            | 5-7, all tables     |
|                          |     | (b) Give reasons for non-participation at each stage                                                                                                                                                         | 5,16                |
|                          |     | (c) Consider use of a flow diagram                                                                                                                                                                           | -                   |
| Descriptive data         | 14* | (a) Give characteristics of study participants (eg demographic, clinical, social) and information on exposures and potential confounders                                                                     | 9, Table 1          |
|                          |     | (b) Indicate number of participants with missing data for each variable of interest                                                                                                                          | Table 1             |
|                          |     | (c) Summarise follow-up time (eg, average and total amount)                                                                                                                                                  | 6                   |
| Outcome data             | 15* | Report numbers of outcome events or summary measures over time                                                                                                                                               | 6-12, all tables    |
| Main results             | 16  | (a) Give unadjusted estimates and, if applicable, confounder-adjusted estimates and their precision (eg, 95% confidence interval). Make clear which confounders were adjusted for and why they were included | 9-12, all tables    |
|                          |     | (b) Report category boundaries when continuous variables were categorized                                                                                                                                    | All relevant tables |
|                          |     | (c) If relevant, consider translating estimates of relative risk into absolute risk for a meaningful time period                                                                                             | -                   |
| Other analyses           | 17  | Report other analyses done—eg analyses of subgroups and interactions, and sensitivity analyses                                                                                                               | 12, all tables      |
| <b>Discussion</b>        |     |                                                                                                                                                                                                              |                     |
| Key results              | 18  | Summarise key results with reference to study objectives                                                                                                                                                     | 12-13               |
| <b>Limitations</b>       |     |                                                                                                                                                                                                              |                     |
| Interpretation           | 20  | Give a cautious overall interpretation of results considering objectives, limitations, multiplicity of analyses, results from similar studies, and other relevant evidence                                   | 14-15               |
| Generalisability         | 21  | Discuss the generalisability (external validity) of the study results                                                                                                                                        | 15-16               |
| <b>Other information</b> |     |                                                                                                                                                                                                              |                     |
| Funding                  | 22  | Give the source of funding and the role of the funders for the present study and, if applicable, for the original study on which the present article is based                                                | 24                  |

\*Give information separately for cases and controls in case-control studies and, if applicable, for exposed and unexposed groups in cohort and cross-sectional studies.

**Note:** An Explanation and Elaboration article discusses each checklist item and gives methodological background and published examples of transparent reporting. The STROBE checklist is best used in conjunction with this article (freely available on the Web sites of PLoS Medicine at <http://www.plosmedicine.org/>, Annals of Internal Medicine at <http://www.annals.org/>, and Epidemiology at <http://www.epidem.com/>). Information on the STROBE Initiative is available at [www.strobe-statement.org](http://www.strobe-statement.org).

# BMJ Open

## Identifying the lifetime cognitive and socioeconomic antecedents of cognitive state: seven decades of follow-up in a British birth cohort study.

|                                 |                                                                                                                                                                                                                                                                                                                                                                                                                                                                                                                                                                   |
|---------------------------------|-------------------------------------------------------------------------------------------------------------------------------------------------------------------------------------------------------------------------------------------------------------------------------------------------------------------------------------------------------------------------------------------------------------------------------------------------------------------------------------------------------------------------------------------------------------------|
| Journal:                        | <i>BMJ Open</i>                                                                                                                                                                                                                                                                                                                                                                                                                                                                                                                                                   |
| Manuscript ID                   | bmjopen-2018-024404.R2                                                                                                                                                                                                                                                                                                                                                                                                                                                                                                                                            |
| Article Type:                   | Research                                                                                                                                                                                                                                                                                                                                                                                                                                                                                                                                                          |
| Date Submitted by the Author:   | 05-Feb-2019                                                                                                                                                                                                                                                                                                                                                                                                                                                                                                                                                       |
| Complete List of Authors:       | Richards, M; UCL, MRC Unit for Lifelong Health and Ageing at UCL<br>James, Sarah-Naomi; MRC Unit for Lifelong Health and Ageing<br>Sizer, Alison; University College London, Epidemiology and Public Health<br>Sharma, Nikhil; MRC Unit for Lifelong Health and Ageing; University<br>College London Hospitals NHS Foundation Trust National Hospital for<br>Neurology and Neurosurgery<br>Rawle, Mark; MRC Unit for Lifelong Health and Ageing<br>Davis, Daniel; MRC Unit for Lifelong Health and Ageing<br>Kuh, Diana; MRC Unit for Lifelong Health and Ageing, |
| <b>Primary Subject Heading</b>: | Epidemiology                                                                                                                                                                                                                                                                                                                                                                                                                                                                                                                                                      |
| Secondary Subject Heading:      | Geriatric medicine                                                                                                                                                                                                                                                                                                                                                                                                                                                                                                                                                |
| Keywords:                       | EPIDEMIOLOGY, Dementia < NEUROLOGY, Old age psychiatry < PSYCHIATRY                                                                                                                                                                                                                                                                                                                                                                                                                                                                                               |
|                                 |                                                                                                                                                                                                                                                                                                                                                                                                                                                                                                                                                                   |

SCHOLARONE™  
Manuscripts

1  
2  
3 Identifying the lifetime cognitive and socioeconomic antecedents of cognitive state: seven  
4 decades of follow-up in a British birth cohort study  
5  
6  
7

8 Marcus Richards <sup>1</sup>, Sarah-Naomi James <sup>1</sup>, Alison Sizer <sup>2</sup>, Nikhil Sharma <sup>1,3</sup>, Mark James  
9 Rawle <sup>1</sup>, Daniel Davis <sup>1</sup>, Diana Kuh <sup>1</sup>.  
10  
11  
12

13  
14 <sup>1</sup> MRC Unit for Lifelong Health and Ageing at UCL, 33 Bedford Place, London WC1B 5JU,  
15 UK  
16  
17

18  
19 <sup>2</sup> Department of Epidemiology and Public Health, University College London, 1-19  
20 Torrington Place, London, WC1E 7HB, UK  
21  
22  
23

24  
25 <sup>3</sup> National Hospital for Neurology and Neurosurgery, Queen Square, London WC1N 3BG,  
26 UK  
27  
28  
29

30 **Correspondence to** Professor Marcus Richards, MRC Unit for Lifelong Health and Ageing  
31 at UCL, 33 Bedford Place, London WC1B 5JU, UK; [m.richards@ucl.ac.uk](mailto:m.richards@ucl.ac.uk) tel. +44 (0)207  
32 670 5710  
33  
34  
35  
36  
37  
38  
39  
40

41 Word count

42  
43 Abstract: 266

44  
45 Main text: 3509  
46  
47  
48  
49

50 Contributorship statement

51  
52 MR conceived the work, conducted the statistical analyses and wrote the manuscript; SNJ  
53 advised on the path modelling; SNJ, AS, NS, MJR,, DD and DK contributed to interpretation  
54 and writing.  
55  
56  
57  
58  
59  
60

## ABSTRACT

**Objectives** The life course determinants of midlife and later life cognitive function have been studied using longitudinal population-based cohort data, but far less is known about whether the pattern of these pathways is similar or distinct for clinically-relevant cognitive state. We investigated this for the Addenbrooke's Cognitive Examination (ACE-III), used in clinical settings to screen for cognitive impairment and dementia.

**Design** Longitudinal birth cohort study.

**Setting** Residential addresses in England, Wales and Scotland.

**Participants** 1762 community-dwelling men and women of European heritage, enrolled since birth in the MRC National Survey of Health and Development (the British 1946 birth cohort).

**Primary outcome** The Addenbrooke's Cognitive Examination (ACE-III).

**Results** Path modelling estimated direct and indirect associations between *APOE* status, father's social class, childhood cognition, education, midlife occupational complexity, midlife verbal ability (National Adult Reading Test; NART), and the total ACE-III score. Controlling for sex, there was a direct negative association between *APOE*  $\epsilon 4$  and the ACE-III score ( $\beta=-0.04$ , [-0.08, -0.002],  $p=0.04$ ), but not between *APOE*  $\epsilon 4$  and childhood cognition ( $\beta=0.03$  [-0.006, 0.69,  $p=0.10$ ] or the NART ( $\beta=0.0005$  [-0.03, 0.03],  $p=0.97$ ). The strongest influences on the ACE-III were from childhood cognition ( $\beta=0.20$  [0.14, 0.26],  $p<0.001$ ) and the NART ( $\beta=0.35$  [0.29, 0.41],  $p<0.001$ ); educational attainment and

1  
2  
3 occupational complexity were modestly and independently associated with the ACE-III  
4  
5 ( $\beta=0.08$  [0.03, 0.14],  $p=0.002$  and  $\beta=0.05$  [0.01, 0.10],  $p=0.02$ , respectively).  
6  
7

8 **Conclusions** The ACE-III in the general population shows a pattern of life course  
9  
10 antecedents that is similar to neuropsychological measures of cognitive function, and may be  
11  
12 utilised to represent normal cognitive ageing as well as a screen for cognitive impairment and  
13  
14 dementia.  
15  
16  
17  
18  
19  
20  
21  
22  
23  
24  
25  
26  
27  
28  
29  
30  
31  
32  
33  
34  
35  
36  
37  
38  
39  
40  
41  
42  
43  
44  
45  
46  
47  
48  
49  
50  
51  
52  
53  
54  
55  
56  
57  
58  
59  
60

For peer review only

### Strengths and limitations of this study

- The MRC National Survey of Health and Development (the British 1946 birth cohort) is a large population-based sample with prospectively obtained information on socioeconomic status and educational attainment, and tested cognitive function from childhood
- The Addenbrooke's Cognitive Examination (ACE-III) is an extensive and comprehensive test of cognitive state.
- Path modelling used parameter estimates for incomplete data, thus minimising effects of missing predictor data
- The path structure of our model may be specific to cohort; NSHD is ethnically homogenous and experienced selective secondary education and high occupational mobility at labour market entry).
- Replication in more diverse populations is therefore required before our model can be considered generalisable

## INTRODUCTION

Using the MRC National Survey of Health and Development (NSHD; the British 1946 birth cohort)[1], we demonstrated multiple paths linking four fundamental developmental and social factors to midlife cognitive function: father's socioeconomic position (SEP), childhood cognitive ability, educational attainment, and own midlife SEP[2]. To our knowledge such a path model to understand key life course influences on cognitive state, as assessed in clinical practice, has not been undertaken. This is partly because the most frequently used tests, such as the Mini Mental Status Examination (MMSE) and Montreal Cognitive Assessment (MoCA), are brief and have pronounced ceiling effects. It would however be valuable to investigate whether life course paths to cognitive state show a similar pattern as those for other cognitive functions, which would inform theoretical understanding of, and methodology for, studies of cognitive ageing across the full population range. At the most recent NSHD wave at age 69, the Addenbrooke's Cognitive Examination 3<sup>rd</sup> edition (ACE-III) was administered. This is a more extensive and comprehensive test of cognitive state than the MMSE or MoCA, with a quasi-normal distribution. Using this outcome we estimated a path model incorporating childhood SEP, childhood cognitive ability, educational attainment and midlife occupational complexity, and adding two new paths. First, the National Adult Reading Test (NART), an outcome in the original path model, was now included as an intervening variable; we hypothesised that influences on cognitive state operate significantly through this test. Second, the apolipoprotein E (*APOE*) gene was included, the best known genetic risk factor for dementia; based on previous work[3] we hypothesised that the  $\epsilon 4$  allele of this gene would be negatively associated with the ACE-III score but not with childhood cognition.

## METHODS

### Participants

The NSHD is a representative sample of 5362 males and females born in England, Scotland, and Wales in one week in March 1946 (<http://www.nshd.mrc.ac.uk/nshd>). The 24th data collection was conducted between 2014 and 2015 when study members were aged 68-69 years[1]. At age 69 study members still alive and with a known current address in mainland Britain (n=2698) were invited to have a home visit by a trained nurse; 2149 (79.7%) completed a visit and a further 55 (2.0%) completed a postal questionnaire instead. Of the original cohort, 1026 (19.1%) had died, 578 (10.8%) were living abroad, 22 (0.4%) asked for their participation to be restricted to postal contacts, 621 (11.6%) had previously withdrawn from the study, and 417 (7.8%) had been lost to follow-up. For this data collection we obtained ethical approval from the NRES Queen Square REC (14/LO/1073), and Scotland A REC (14/SS/1009). All participants gave written informed consent to collect these data.

### Measures

Principal outcome: the ACE -III

The ACE-III is a screen-implemented test of cognitive state, and has been validated as a screening tool for cognitive deficits in Alzheimer's disease and frontotemporal dementia[4].

The ACE-III is divided into five domains: attention & orientation (scored 0-18), verbal fluency (0-14), memory (0-26), language (0-26), and visuospatial function (0-16). Thus the maximum total score is 100. Due to the inclusion of verbal fluency, the distribution of the total score is quasi-normal and avoids the pronounced ceiling effect of most cognitive state tests. A customised version of the ACE-III was administered by iPad using ACEMobile (<http://www.acemobile.org/>); where this was not possible, a paper version was used. All offline scoring was undertaken by trained personnel. Of the 2149 participants who had a



1  
2  
3 home visit, 32 refused or were unable to undertake the ACE-III. Of the remaining 2117, 35  
4  
5 undertook but did not complete this; and for the remaining 2082, data for 320 were lost  
6  
7 through equipment failure. Thus complete ACE-III data were available for 1762 participants,  
8  
9 82.0% of those who received a home visit.  
10  
11  
12  
13

#### 14 Genetic risk

15  
16 Genetic risk was primarily represented by the *APOE*  $\epsilon$ 4 allele. Using blood taken at age 53 or  
17  
18 69-71 by a research nurse, KBioscience analysed SNPs rs429358 and rs7412 to determine  
19  
20 *APOE* genotype. Distribution of alleles was as follows (n = 2686),  $\epsilon$ 2/ $\epsilon$ 2 n=20 (0.74%),  $\epsilon$ 2/ $\epsilon$ 3  
21  
22 n=318 (11.84%),  $\epsilon$ 3/ $\epsilon$ 3 n=1538 (57.26%),  $\epsilon$ 2/ $\epsilon$ 4 n=68 (2.53%),  $\epsilon$ 3/ $\epsilon$ 4 n=657 (24.46%),  $\epsilon$ 4/ $\epsilon$ 4  
23  
24 n=85 (3.16%). For analysis, *APOE* genotype was recoded categorically for the presence of  $\epsilon$ 4  
25  
26 alleles, with carriers of  $\epsilon$ 2 included as non *APOE*  $\epsilon$ 4 carriers. Because of difficulties in  
27  
28 interpreting potentially opposing effects on cognition, the 68 participants with  $\epsilon$ 2/ $\epsilon$ 4 were  
29  
30 excluded. Thus *APOE* was categorized as no  $\epsilon$ 4 vs. heterozygous  $\epsilon$ 4 or homozygous  $\epsilon$ 4. For  
31  
32 comparison with *APOE*, polygenic scores (PGS) for Alzheimer's disease were calculated for  
33  
34 2,768 participants using blood samples taken at age 53 and 60-64. Genotyping was carried  
35  
36 out on the NeuroX2 chip. PGSs were created using Allelic Scoring function in PLINK\_v1.9.  
37  
38 The base dataset used to calculate the PGS was the large, two-stage meta-analysis of genome-  
39  
40 wide association studies in individuals of European heritage conducted by the International  
41  
42 Genomics of Alzheimer's Project (IGAP)[5]. Linkage-disequilibrium parameters were set to  
43  
44  $r^2 > 0.2$  and a physical distance threshold for clumping SNPs set to 1Mb. The PGS included  
45  
46 the SNPs with a p-value in the I-GAP meta-analysis of  $p < 0.05$  (n= 31746).  
47  
48  
49  
50  
51  
52  
53

#### 54 Early life SEP

55  
56 Early life SEP was assessed using father's occupational social class and mother's education,  
57  
58 which is associated with offspring cognition independently of father's occupation[6]. The  
59  
60

1  
2  
3 former was classified when participants were aged 11 (or at 4 or 15 years if this was  
4  
5 unknown) according to the UK Registrar General: professional, managerial, intermediate,  
6  
7 skilled manual, semiskilled manual, unskilled; mother's education was coded as primary only  
8  
9 vs. secondary or any formal qualifications.  
10  
11  
12  
13

#### 14 15 Childhood cognitive function

16  
17 At 8 years participants took tests of verbal and nonverbal ability devised by the National  
18  
19 Foundation for Educational Research[7], and administered by teachers or other trained  
20  
21 personnel. These tests were: (1) reading comprehension (selecting appropriate words to  
22  
23 complete 35 sentences), (2) word reading (ability to pronounce 50 words), (3) vocabulary  
24  
25 (ability to explain the meaning of these 50 words), and (4) picture intelligence, consisting of a  
26  
27 60-item nonverbal reasoning test. Scores for each test were standardized to the whole sample,  
28  
29 then summed to create a total score representing overall cognitive ability at this age.  
30  
31  
32  
33  
34

#### 35 36 Educational attainment

37  
38 The highest educational qualification achieved by 43 years was grouped into no qualification,  
39  
40 below ordinary secondary qualifications (vocational), ordinary secondary qualifications ('O'  
41  
42 levels and their training equivalents), advanced secondary qualifications ('A' levels and their  
43  
44 equivalents), or higher qualifications (degree or equivalent).  
45  
46  
47  
48

#### 49 50 Midlife occupational complexity

51  
52 Midlife occupational complexity was represented by the National Statistics Socio-Economic  
53  
54 Classification (NS-SEC) of the job held at age 53 or earlier if this was missing[8]. This  
55  
56 provides a measure of employment relations and the conditions of employment, based on the  
57  
58 Standard Occupational Classification (SOC): details of individual employment status (i.e.  
59  
60

1  
2  
3 employer/ employee/ self-employed); supervisory position; and number of employees in the  
4 workplace. For NSHD information was available on the start and end dates of up to 27 jobs  
5 and their NS-SEC categories, which were recoded into 7 classes: 1. Higher managerial,  
6 administrative and professional occupations; 2. Lower managerial, administrative and  
7 professional occupations; 3. Intermediate occupations; 4. Small employers and own account  
8 workers; 5. Lower supervisory and technical occupations; 6. Semi-routine occupations; 7.  
9 Routine occupations.

### 20 21 The NART

22 The NART assesses ability to pronounce 50 words of increasing difficulty[9]. These words  
23 violate conventional pronunciation rules, and are therefore unlikely to be read correctly  
24 unless the reader is familiar with them rather than relies on intelligent guesswork. Thus the  
25 NART serves as a measure of general (crystallised') cognitive ability.  
26  
27  
28  
29  
30  
31  
32  
33  
34

35 All measures were coded so that higher values signified higher status or function.  
36  
37  
38  
39

### 40 **Statistical methods**

41 All statistical analyses were conducted using STATA version 15[10]. Path modelling was  
42 used to quantify associations between each predictor variable and the ACE-III. Since each of  
43 the predictor variables are closely inter-related, the model also quantified their independent  
44 inter-associations. We hypothesized two key components within this model: 1. strong paths  
45 from childhood cognition and the NART to the ACE-III, with modest and weak additional  
46 contributions from education and midlife occupational complexity, respectively, and no  
47 direct path from childhood SEP[2]; 2. a direct negative path from APOE  $\epsilon$ 4 to the ACE-III  
48 but not via childhood cognition[3] or the NART. No directionality of association was  
49  
50  
51  
52  
53  
54  
55  
56  
57  
58  
59  
60

1  
2  
3 assumed between mother's education and father's social class, or between occupational  
4 complexity and the NART; these paths are therefore represented as correlational only. The  
5 path model was adjusted for gender, and incorporated full information maximum likelihood  
6 (FIML) parameter estimates to include those with item-missingness. FIML is preferable to  
7 estimation based on complete data, since FIML estimates tend to be less biased and more  
8 reliable than estimates based on list-wise deletion, even when the data deviate from missing  
9 at random and are non-ignorable[11]. Three criteria were used to assess model fit: 1. the  $\chi^2$   
10 test, although this can be overly sensitive to model misspecification when sample sizes are  
11 large; 2. the root mean square error of approximation (RMSEA), which gives a measure of  
12 the discrepancy in fit per degrees of freedom. It is bounded below by zero, only taking this  
13 value if the model fits exactly. If the RMSEA is  $< 0.05$ , the model is considered a close fit to  
14 the data; 3. the comparative fit index (CFI), whose values are restricted to a 0 to 1 continuum,  
15 with higher values indicating a better fit. CFI is normally tested against a minimum criterion  
16 value of 0.95.  
17  
18  
19  
20  
21  
22  
23  
24  
25  
26  
27  
28  
29  
30  
31  
32  
33  
34  
35  
36  
37

### 38 **Patient and Public Involvement**

39  
40 Participants have a lifelong association with NSHD. Over the 70 years of the study, the  
41 research team has increasingly involved participants, in line with changing norms about  
42 conducting cohort studies, starting at age 16 (in 1962) with the annual dissemination of study  
43 findings in birthday cards and this continues. Participants have always received a personal  
44 letter from the Director whenever they have raised queries or provided additional comments,  
45 including suggestions for new topics to study. In the last ten years, the research team has  
46 increased the level of participant involvement through invitations to study events and focus  
47 groups to discuss clinical sub-studies; and a new participant website  
48 ([www.nshd.mrc.ac.uk/study-members/](http://www.nshd.mrc.ac.uk/study-members/)) was developed in line with their feedback. When  
49  
50  
51  
52  
53  
54  
55  
56  
57  
58  
59  
60

1  
2  
3 piloting new questionnaires and assessments, we recruit patients from GP practices or from  
4  
5 the UCLH PPI and take into account their feedback when designing the mainstage fieldwork  
6  
7 for NSHD participants.  
8  
9

## 10 11 12 13 RESULTS

### 14 15 Descriptive

16  
17 As noted, sample size was 1762, the maximum N for the ACE-III. Those who were not  
18  
19 interviewed at age 69 for any reason showed no difference in *APOE* ε4 frequency ( $p=0.72$ )  
20  
21 but had lower childhood cognition and NART scores, and were more likely to be  
22  
23 disadvantaged in terms of father's social class, mother's education, own education and  
24  
25 occupational complexity (all  $p<0.001$ ). Those not interviewed were also previously shown to  
26  
27 have three or more clinical disorders at the previous assessment (age 60-64), a general health  
28  
29 self-rating as poor or fair rather than good, and a longstanding limiting illness, although the  
30  
31 latter was not associated with interview participation after controlling for socioeconomic and  
32  
33 cognitive characteristics[1]. Of those interviewed at age 69, there were no differences in any  
34  
35 of the path variables between those with and without ACE-III data, except for a slight trend  
36  
37 for the ACE-III to be missing in those with no educational qualifications ( $\chi^2=9.5$ ,  $p=0.05$ ).  
38  
39 Frequencies for each category of *APOE* group, childhood and midlife SEP and educational  
40  
41 attainment, and means and SDs for the ACE-III and NART, are shown in Table 1.  
42  
43  
44  
45  
46  
47  
48  
49

50 **Table 1** Frequency distributions for *APOE* group, childhood and midlife SEP, educational  
51  
52 attainment, and mean NART and ACE-III scores (for 1762 participants with ACE-III data)  
53  
54

---

55  
56  
57 Variable N % N %  
58  
59  
60

---

*APOE*

|                           |      |        |
|---------------------------|------|--------|
| No $\epsilon$ 4           | 1076 | (61.1) |
| Heterozygous $\epsilon$ 4 | 388  | (21.0) |
| Homozygous $\epsilon$ 4   | 48   | (2.7)  |
| Missing                   | 250  | (14.2) |

## Father's social class

|                |     |        |
|----------------|-----|--------|
| Professional   | 134 | (7.6)  |
| Managerial     | 372 | (21.1) |
| Intermediate   | 296 | (16.8) |
| Skilled manual | 519 | (29.4) |
| Semiskilled    | 271 | (15.4) |
| Unskilled      | 79  | (4.5)  |
| Missing        | 91  | (5.2)  |

## Mother's education

|                                           |      |        |
|-------------------------------------------|------|--------|
| Primary only                              | 1151 | (65.3) |
| Secondary or any<br>formal qualifications | 421  | (23.9) |
| Missing                                   | 611  | (10.8) |

## Educational attainment (by age 43)

|                   |     |        |
|-------------------|-----|--------|
| No qualifications | 403 | (22.9) |
| Vocational only   | 235 | (13.3) |

|    |                      |      |        |
|----|----------------------|------|--------|
| 1  |                      |      |        |
| 2  |                      |      |        |
| 3  | Ordinary ('O') level | 340  | (19.3) |
| 4  |                      |      |        |
| 5  | Advanced ('A') level | 497  | (28.2) |
| 6  |                      |      |        |
| 7  | Higher               | 2.73 | (15.5) |
| 8  |                      |      |        |
| 9  |                      |      |        |
| 10 | Missing              | 14   | (0.8)  |
| 11 |                      |      |        |
| 12 |                      |      |        |
| 13 |                      |      |        |

NSSEC occupation (by age 53)\*

|    |         |     |        |
|----|---------|-----|--------|
| 16 |         |     |        |
| 17 | 1.      | 221 | (12.5) |
| 18 |         |     |        |
| 19 | 2.      | 504 | (28.6) |
| 20 |         |     |        |
| 21 | 3.      | 307 | (17.4) |
| 22 |         |     |        |
| 23 | 4.      | 200 | (11.4) |
| 24 |         |     |        |
| 25 | 5.      | 120 | (6.8)  |
| 26 |         |     |        |
| 27 | 6.      | 228 | (12.9) |
| 28 |         |     |        |
| 29 | 7.      | 154 | (8.7)  |
| 30 |         |     |        |
| 31 |         |     |        |
| 32 |         |     |        |
| 33 | Missing | 28  | (1.6)  |
| 34 |         |     |        |
| 35 |         |     |        |
| 36 |         |     |        |
| 37 |         |     |        |
| 38 |         |     |        |
| 39 |         |     |        |

Mean (SE)

|    |         |       |        |
|----|---------|-------|--------|
| 40 |         |       |        |
| 41 |         |       |        |
| 42 | NART    | 35.6  | (0.22) |
| 43 |         |       |        |
| 44 | ACE-III | 91.52 | (0.14) |
| 45 |         |       |        |
| 46 |         |       |        |
| 47 |         |       |        |

---

\*1. Higher managerial, administrative and professional occupations; 2. Lower managerial, administrative and professional occupations; 3. Intermediate occupations; 4. Small employers and own account workers; 5. Lower supervisory and technical occupations; 6. Semi-routine occupations; 7. Routine occupations.

### Path model

Figure 1 shows the path model. All paths are mutually adjusted. Goodness of fit statistics indicated that the model was an excellent representation of the data ( $\chi^2=0.15$ ,  $p=1.0$  for analytic vs. saturated model; RMSEA=0,  $p=1.0$ ; CFI = 1.0). Gender effects and all non-significant paths ( $P$  value  $>.05$ ) are not shown.

[Figure 1 about here]

The strongest influences on the ACE-III score were from the NART, and from childhood cognition, which was mainly associated with the ACE-III via educational attainment and the NART, but also directly with the ACE-III. The influence of midlife occupational complexity was more modest, and was itself part-mediated by the NART. There was no direct path from father's social class or mother's education to the ACE-III, but these had independent associations with childhood cognition, educational attainment and midlife occupational complexity, in descending order of magnitude. *APOE*  $\epsilon 4$  showed a modest direct negative association with the ACE-III score, but was not associated with childhood cognition or the NART. When the model was re-run replacing *APOE* with the PGS, the path to the ACE-III was of negligible magnitude ( $\beta=0.004$  95% CI -0.031, 0.038,  $p=0.82$ ). The paths from the latter to childhood cognition and the ACE-III were also nonsignificant ( $\beta = -.02$ , 95% CI -0.05, 0.019,  $p = 0.35$ ;  $\beta = 0.002$ , 95% CI -0.04, 0.04,  $p = 0.9$ , respectively). However, the path from PGS to NART was significantly negative ( $\beta = -0.03$ , 95% CI -0.06, -0.004,  $p = 0.03$ ).

When the model was re-run on the ACE-III sub-scales, *APOE*  $\epsilon 4$  was associated with Attention and Memory, with a similar magnitude to that of the total score (Supplementary Table 1); this reached 5% significance when these two scales were combined. Associations between *APOE*  $\epsilon 4$  and the Language, Fluency and Visuospatial scales were negligible.



1  
2  
3 Childhood cognition was significantly associated with Attention, Memory and Fluency  
4  
5 (negatively in the case of the latter, even though other variables were associated in the  
6  
7 expected direction), but not Language or Visuospatial. Education, occupational complexity  
8  
9 and the NART were associated with Fluency, Memory and Visuospatial to varying degrees,  
10  
11 but none of these were significantly associated with Attention, and only occupational  
12  
13 complexity was associated with Language (Supplementary Table 1).  
14  
15  
16  
17  
18

## 19 **DISCUSSION**

20  
21  
22 In the NSHD we estimated a path model describing key life course influences on cognitive  
23  
24 state using the Addenbrooke's cognitive examination (ACE-III). Confirming our main study  
25  
26 hypothesis, by far the strongest influence on this outcome was from lifetime cognition, most  
27  
28 strongly from general cognitive ability in midlife, assessed by the NART. The NART in turn  
29  
30 was particularly influenced by childhood cognition. To a lesser extent educational attainment  
31  
32 was positively associated with the ACE-III, independently of childhood cognition, although  
33  
34 the model suggests that this was part-mediated by the NART. Occupational complexity  
35  
36 showed more modest effects still, and there were no direct associations between either  
37  
38 measure of childhood SEP (mother's education and father's occupational social class) and the  
39  
40 ACE-III, although these latter variables were associated with the intervening variables with  
41  
42 magnitudes directly proportional to proximity. Finally, there was a direct negative association  
43  
44 between the *APOE*  $\epsilon 4$  allele and the ACE-III;  $\epsilon 4$  was not associated with childhood cognitive  
45  
46 function, nor with the NART. The pattern of associations for parental SEP, childhood  
47  
48 cognition and education broadly reflect those previously shown in this cohort when the  
49  
50 NART was an outcome rather than a predictor[2], even with an important genetic influence  
51  
52 on cognitive function (*APOE*  $\epsilon 4$ ) controlled. However, it is notable that, with the NART  
53  
54 controlled, childhood cognition, education and midlife SEP additionally showed direct  
55  
56  
57  
58  
59  
60

1  
2  
3 associations with the ACE-III, with childhood cognition having the strongest effect, and  
4  
5 midlife SEP the weakest.  
6  
7

8 Major strengths of this study are: 1. the use of a large representative population-based birth  
9  
10 cohort; 2. an extensive and comprehensive measure of cognitive state (ACE-III) as an  
11  
12 outcome; 3. prospective measures across the life course, including tested childhood  
13  
14 cognition, which enabled a comprehensive prospective life course model of mental state; 4.  
15  
16 path modelling that uses FIML parameter estimates for incomplete data, thus minimizing  
17  
18 effects of missing predictor data. Against these strengths we should note the disproportionate  
19  
20 loss to follow-up in those less socially advantaged, with lower prior cognitive function, and  
21  
22 with higher physical morbidity. Also, the path structure of our model may be specific to the  
23  
24 cohort (NSHD is ethnically homogenous) and period (NSHD experienced selective  
25  
26 secondary education and high occupational mobility at labor market entry). While our  
27  
28 previous work suggests a broadly robust path structure in the face of social change[12],  
29  
30 replication in more diverse populations is required before our model can be considered  
31  
32 generalizable.  
33  
34  
35  
36  
37  
38

39 Our path model suggests that cognitive state has a prominent general cognitive ability  
40  
41 component, which in turn has cognitive antecedents extending back into childhood. It might  
42  
43 be argued that the influence of the NART is a matter of circularity, reflecting the dominance  
44  
45 of verbal-based tests within the ACE-III (accounting for 84% of the total score). However,  
46  
47 the NART also correlates with non-verbal skills[9]. The most obvious difference between the  
48  
49 NART and the ACE-III is that the constituent tests of the latter are ‘fluid’ measures, sensitive  
50  
51 to age and morbidity-associated decline; whereas the former, as a measure of ‘crystallized’  
52  
53 ability, is stable even in the face of mild dementia[13]. Further follow-up will determine  
54  
55 whether the cognitive paths within our model retain their magnitude and pattern as the ACE-  
56  
57  
58  
59  
60 III scores change over time. In this context it is important to note that the present study has

1  
2  
3 not yet incorporated the clinical outcomes of Mild Cognitive Impairment (MCI) and  
4 dementia, where a life course approach to the latter has been described[14]. Cognitive  
5 decline from approximately the same age has been observed elsewhere when participants  
6 with these outcomes were excluded[15]; and also across midlife in NSHD, not explained by  
7 concomitant medical conditions[16], the treatment of which can increase risk of MCI and  
8 dementia[17,18].  
9

10  
11 In regard to the long-term cognitive antecedents of the ACE-III, the present study extends our  
12 previous studies showing that childhood cognition tracks across the life course even when  
13 education, lifetime socioeconomic position[2] and adolescent mental health[19] are  
14 controlled. This tracking is also consistent with earlier studies in relation to cognitive  
15 ageing[20] and risk of dementia[21,22]; and with studies showing that associations between  
16 tests of mental state and verbal cognitive ability are strongly explained by childhood  
17 cognitive function[23,24]. We also observed an additional direct association between  
18 childhood cognition and the ACE-III that was independent of the NART as well as other  
19 factors in the model. This is probably because the measures of childhood cognition capture a  
20 wider range of function than the NART, including nonverbal reasoning, even though, as  
21 noted, the NART itself predicts a comprehensive range of cognitive function[9].  
22  
23  
24  
25  
26  
27  
28  
29  
30  
31  
32  
33  
34  
35  
36  
37  
38  
39  
40  
41  
42  
43

44 The next most prominent influence on the ACE-III was from educational attainment, which  
45 was primarily based on qualifications through formal education, but also captured  
46 qualifications achieved up to early midlife, whether through job training or other paths  
47 through adult education. This was associated with the ACE-III even when childhood  
48 cognition was controlled. As with childhood cognition itself, the influence of education was  
49 largely through the NART, although again there was a modest independent association with  
50 the ACE-III, since education also shapes non-verbal cognitive skills[25]. An association  
51 between education and subsequent cognition independent of childhood cognition has long  
52  
53  
54  
55  
56  
57  
58  
59  
60

1  
2  
3 been observed[26]; has been replicated in two other birth cohorts[27]; is shown in NSHD to  
4 be additive with respect to adult education[28]; and responds rapidly to policy[12]. By way of  
5 interpretation, it is important to note that education is not just a process of ‘cognitive  
6 stimulation’. Schools indeed teach specific knowledge, but can also teach practical skills,  
7 including how to approach cognitive testing, refine other cognitive skills, and shape non-  
8 cognitive skills that are likely to have long-term benefit to cognitive function[29,19]. Policies  
9 to improve access to education, and widen educational curricula to strengthen all these skills,  
10 are likely to have long-term benefits to cognitive ageing, and risk of dementia.

11  
12  
13  
14  
15  
16  
17  
18  
19  
20  
21  
22 Finally, we should consider the role of *APOE* in the model. This is involved in the transport  
23 of cholesterol and other lipids between cellular structures, and  $\epsilon 4$  has a higher rate of  
24 lipoprotein clearance thus altering its bioavailability[30]. *APOE* is also involved in clearing  
25 beta amyloid from the brain, and  $\epsilon 4$  may be less efficient at this[31]. A direct association  
26 between the  $\epsilon 4$  allele and the ACE-III was found in our model; this was of relatively weak  
27 magnitude, was only observed in homozygotes, and was not observed with any other variable  
28 in the model including prior cognitive function. These findings are consistent with evidence  
29 that  $\epsilon 4$  zygosity shows a dose-response for Alzheimer’s disease[32]; with a study showing no  
30 association with childhood cognition although observed in old age in the same cohort[3]; and  
31 with parallel evidence from NSHD that decline in verbal memory from age 43 to 69 is faster  
32 in *APOE* homozygosity[33]. There is no consensus over whether *APOE* is associated with  
33 normal cognitive ageing as opposed to clinical decline[3,32-38]. However, this may be age-  
34 dependent[35]; intriguingly, while no association was found between  $\epsilon 4$  and fluid cognitive  
35 measures in NSHD at age 53[33,36], this association is now evident 16 years later, albeit  
36 modestly. In regard to cognitive domain, it is interesting to note the finding that *APOE*  $\epsilon 4$   
37 was associated with attention and memory in particular. This is a potentially important  
38 finding since three of five neuropsychological tests identified by a meta-analysis as having  
39  
40  
41  
42  
43  
44  
45  
46  
47  
48  
49  
50  
51  
52  
53  
54  
55  
56  
57  
58  
59  
60

1  
2  
3 the highest predictive accuracy for progression from mild cognitive impairment to  
4  
5 Alzheimer's disease were of episodic memory[39]. It should also be highlighted that the  
6  
7 presence of *APOE* in the model means that the structure and magnitude of the pathways,  
8  
9 including those between parental social class and childhood cognition, were independent of  
10  
11 this. Adding *APOE* does not of course comprehensively control for genetic influence on  
12  
13 cognitive ageing. However, the  $\epsilon 4$  allele of this gene is the best-known genetic risk factor for  
14  
15 clinically significant cognitive decline[40].  
16  
17

18  
19  
20 In contrast to *APOE*  $\epsilon 4$ , a polygenic score for AD was associated with a lower NART score,  
21  
22 this was not associated with the ACE-III, although scores based on the same IGAP database  
23  
24 used as a reference for the PRS in this study are predictive of AD itself[41]. The lack of  
25  
26 association between a PGS for AD and general cognitive ability is consistent with a recent  
27  
28 study using the Lothian birth cohort[42], although these authors found an association for  
29  
30 cognitive slope (but not intercept) with a more stringent whole-genome threshold (0.01) than  
31  
32 ours (0.05). They suggest that SNPs unrelated to *APOE*  $\epsilon 4$  may be overpowering the signal  
33  
34 from this; indeed, a systematic analysis of the GenAge database found *APOE* to be one of the  
35  
36 top 3 genes associated with the greatest number of age-related diseases[43].  
37  
38  
39

40  
41 In conclusion, the ACE-III in the general ageing population shows a pattern of life course  
42  
43 antecedents that is similar to neuropsychological measures of cognitive function. This may  
44  
45 not have emerged from studies using briefer tests of cognitive state such as the MMSE, since  
46  
47 most of these have ceiling effects outside the clinical context that limit their use as  
48  
49 continuous measures. As noted, continuing follow-up of NSHD will elucidate whether the  
50  
51 path structure we describe here changes as an increasing number of participants meet clinical  
52  
53 criteria for dementia, and the distribution of the ACE-III shifts accordingly.  
54  
55  
56

## 57 58 **Acknowledgements** 59 60

1  
2  
3 We thank NSHD study members for their lifelong participation and past and present  
4 members of the NSHD study team who helped to collect the data. We also thank ACE  
5  
6  
7 Mobile for providing a customized version of the ACE-III for NSHD.  
8  
9  
10  
11  
12  
13

### 14 **Funding**

15  
16  
17 This study was supported by the UK Medical Research Council, which provides core funding  
18 for the NSHD, and supports the authors by MC\_UU\_12019/1 (Enhancing NSHD), and /3  
19 (Mental Ageing). DD is additionally funded through a Wellcome Trust Intermediate Clinical  
20 Fellowship (WT107467). SNJ is additionally funded by Alzheimer's Research UK (ARUK-  
21 PG2014–1946, ARUK-PG2017-1946).  
22  
23  
24  
25  
26  
27  
28

### 29 **Data Sharing**

30  
31  
32 Bona fide researchers can apply to access the NSHD data via a standard application  
33 procedure (further details available at: <http://www.nshd.mr.cac.uk/data.aspx>).  
34  
35  
36  
37  
38  
39  
40

### 41 **Competing interests**

42  
43  
44 None disclosed.  
45  
46

47 Figure legend: Figure 1. Path model for the ACE-III total score  
48  
49  
50  
51  
52  
53  
54  
55  
56  
57  
58  
59  
60

## REFERENCES

- 1 Kuh D, Wong A, Shah I, et al. The MRC National Survey of Health and Development reaches age 70: maintaining participation at older ages in a birth cohort study. *Eur J Epidemiol* 2016;31:1135–1147.
- 2 Richards M, Sacker A. Lifetime antecedents of cognitive reserve. *J Clin Exp Neuropsychol* 2003;25:614–624.
- 3 Deary IJ, Whiteman MC, Pattie A, et al. Cognitive change and the APOE epsilon 4 allele. *Nature* 2002;418:932. (erratum *Nature* 2002;419:450)
- 4 Hsieh S, Schubert S, Hoon C, et al. Validation of the Addenbrooke's Cognitive Examination III in frontotemporal dementia and Alzheimer's disease. *Dement Geriatr Cogn Disord* 2013;36:242–250.
- 5 Lambert JC, Ibrahim-Verbaas CA, Harold D, et al. Meta-analysis of 74,046 individuals identifies 11 new susceptibility loci for Alzheimer's disease. *Nat Genet* 2013;45:1452-8.
- 6 Kaplan GA, Turrell G, Lynch JW, Everson SA, Helkala EL, Salonen JT. Childhood socioeconomic position and cognitive function in adulthood. *Int J Epidemiol* 2001;30:256-63.
- 7 Pigeon DA. Tests used in the 1954 and 1957 surveys. In: Douglas JWB ed. *The home and the school*. London: Macgibbon & Key 1964 appendix 1:129-132.
- 8 ONS. 2014. The National Statistics Socio-economic Classification (NS-SEC rebased on the SOC2010) [Online]. Newport, Wales: Office for National Statistics. Available: <http://www.ons.gov.uk/ons/guide-method/classifications/current-standard-classifications/soc2010/soc2010-volume-3-ns-sec--rebased-on-soc2010--user-manual/index.html>.

- 1  
2  
3 9 Nelson HE, Willison JR. National Adult Reading Test (NART). 2<sup>nd</sup> ed. Windsor:  
4 NFER-Nelson 1991.  
5  
6  
7  
8 10 *StataCorp.* 2017. Stata Statistical Software: Release 15. College Station, TX:  
9 StataCorp LLC.  
10  
11  
12 11 Arbuckle JC. Full information estimation in the presence of incomplete data. In:  
13 Marcoulides GA, Schumacker RE eds. *Advanced Structural Equation Modeling*  
14 *Techniques*. Mahwah, NJ: Lawrence Erlbaum Associates, 1996:243-277.  
15  
16  
17  
18 12 Richards M, Power C, Sacker A. Paths to literacy and numeracy problems: evidence  
19 from two British birth cohorts. *J Epidemiol Community Health* 2009;63:239–244.  
20  
21  
22  
23 13 McGurn B, Starr JM, Topfer JA, et al. Pronunciation of irregular words is preserved  
24 in dementia, validating premorbid IQ estimation. *Neurology* 2004;62:1184–1186.  
25  
26  
27  
28 14 Whalley LJ, Dick FD, McNeill G. A life-course approach to the aetiology of late-  
29 onset dementias. *Lancet Neurol* 2006;5:87-96.  
30  
31  
32  
33 15 McCarrey AC, An Y, Kitner-Triolo MH, Ferrucci L, Resnick SM. Sex differences in  
34 cognitive trajectories in clinically normal older adults. *Psychol Aging* 2016;31:166-  
35 175.  
36  
37  
38  
39  
40 16 Davis D, Cooper R, Muniz Terrera G, Hardy R, Richards M, Kuh D. Verbal memory  
41 and search speed in early midlife are associated with mortality over 25 years follow-  
42 up, independently of health status and early life factors. A British birth cohort study.  
43 *Int J Epidemiol* 2016;45:1216-1225.  
44  
45  
46  
47  
48  
49  
50 17 Rawle MJ, Cooper R, Kuh D, Richards M. Associations between polypharmacy and  
51 cognitive and physical capability: A British Birth Cohort Study. *J Am Geriatr Soc*  
52 2018;66:916-923.  
53  
54  
55  
56  
57  
58  
59  
60



- 1  
2  
3 18 Richardson K, Fox C, Maidment I, et al. Anticholinergic drugs and risk of dementia:  
4 case-control study. *BMJ* 2018;361:k1315.  
5  
6  
7  
8  
9 19 Xu MK, Jones PB, Barnett JH, et al. Adolescent self-organization predicts midlife  
10 memory in a prospective birth cohort study. *Psychology Aging* 2013;28:958–68.  
11  
12  
13 20 Plassman B, Welsh K, Helms M, et al. Intelligence and education as predictors of  
14 cognitive state in late life: A 50-year follow-up. *Neurology* 1995;45:1446–1450.  
15  
16  
17 21 Snowdon DA, Kemper SJ, Mortimer JA, et al. Linguistic ability in early life and  
18 cognitive function and Alzheimer’s disease in late life. Findings from the Nun Study.  
19  
20  
21  
22  
23  
24  
25 22 McGurn B, Deary IJ, Starr JM. Childhood cognitive ability and risk of late-onset  
26 Alzheimer and vascular dementia. *Neurology* 2008;71:1051–1056.  
27  
28  
29 23 Crawford JR, Deary IJ, Starr J, et al. The NART as an index of prior intellectual  
30 functioning: a retrospective validity study covering a 66-year interval. *Psychol Med*  
31  
32  
33  
34  
35  
36 24 Dykiert D, Der G, Starr JM, et al. Why is Mini-Mental state examination  
37 performance correlated with estimated premorbid cognitive ability? *Psychol Med*  
38  
39  
40  
41  
42  
43 25 Roselli R, Ardila A. The impact of culture and education on non-verbal  
44 neuropsychological measurements: A critical review. *Brain Cognition* 2003;52:326–  
45  
46  
47  
48  
49  
50 26 Snow RE, Yalow E. Education and intelligence. In: Sternberg RJ, ed. Handbook of  
51 human intelligence. Cambridge, MA: Cambridge University Press, 1982:493-585.  
52  
53  
54 27 Clouston S, Kuh D, Herd P, et al. Benefits of educational attainment on adult fluid  
55 cognition: international evidence from three birth cohorts. *Int J Epidemiol*  
56  
57  
58  
59  
60

- 1  
2  
3 28 Hatch SL, Feinstein L, Link B, et al. The continuing benefits of education: adult  
4 education and midlife cognitive ability in the British 1946 birth cohort. *J Gerontol*  
5  
6 *Series B* 2007;62:S404–414.  
7  
8  
9  
10 29 Richards M, Hatch, SL. A life course approach to the development of mental skills.  
11  
12 *Journal of Gerontology Series B* 2011;66:Suppl 1, i26–35.  
13  
14  
15 30 Poirier J, Davignon J, Bouthillier D, et al. Apolipoprotein E polymorphism and  
16  
17 Alzheimer's disease. *Lancet* 1993;342:697–699.  
18  
19 31 Jiang Q, Lee CY, Mandrekar S, et al. ApoE promotes the proteolytic degradation of  
20  
21 A $\beta$ . *Neuron* 2008;58:681–693.  
22  
23  
24 32 Jorm AF, Mather KA, Butterworth P, et al. APOE genotype and cognitive  
25  
26 functioning in a large age-stratified population sample. *Neuropsychology* 2007;21:1–  
27  
28 8.  
29  
30  
31 33 Rawle M, Davis D, Bendayan B, et al. Apolipoprotein-E (APOE)  $\epsilon$ 4 and cognitive  
32  
33 decline over the adult life course. *Transl Psychiat* 2018 Jan 10;8:18. doi:  
34  
35 10.1038/s41398-017-0064-8.  
36  
37  
38 34 Caselli RJ, Dueck AC, Osborne D, et al. Longitudinal Modeling of Age-Related  
39  
40 Memory Decline and the APOE  $\epsilon$ 4 Effect. *N Engl J Med* 2009;361:255–263.  
41  
42  
43 35 Wisdom NM, Callahan JL, Hawkins KA. The effects of apolipoprotein E on non-  
44  
45 impaired cognitive functioning: a meta-analysis. *Neurobiol Aging* 2011;32:63–74.  
46  
47  
48 36 Alfred T, Ben-Shlomo Y, Cooper R, et al. Associations between APOE and low-  
49  
50 density lipoprotein cholesterol genotypes and cognitive and physical capability: the  
51  
52 HALCyon programme. *Age* 2014;36:9673.  
53  
54  
55 37 Bunce D, Bielak AA, Anstey KJ, et al. APOE genotype and cognitive change in  
56  
57 young, middle-aged, and older adults living in the community. *J Gerontol A Biol Sci*  
58  
59 *Med Sci* 2014;69:379–386.  
60

- 1  
2  
3 38 Knight RG, Tsui HS, Abraham WC, et al. Lack of effect of the apolipoprotein E  
4 epsilon4 genotype on cognition during healthy aging. *J Clin Exp Neuropsychol*  
5 2014;36:742–750.  
6  
7  
8  
9  
10 39 Belleville S, Fouquet C, Hudon C, Zomahoun HTV, Consortium for the Early  
11 Identification of Alzheimer’s disease-Quebec. Neuropsychological measures that  
12 predict progression from mild cognitive impairment to Alzheimer’s type dementia in  
13 older adults: a systematic review and meta-analysis. *Neuropsychol Rev* 2017;27:328-  
14 353.  
15  
16  
17  
18  
19  
20  
21 40 Farrer LA, Cupples LA, Haines JL, et al. Effects of age, sex, and ethnicity on the  
22 association between apolipoprotein E genotype and Alzheimer disease. A meta-  
23 analysis. APOE and Alzheimer Disease Meta Analysis Consortium. *JAMA*  
24 1997;278:1349–1356.  
25  
26  
27  
28  
29  
30  
31 41 Escott-Price V, Sims R, Bannister C, et al. Common polygenic variation enhances  
32 risk prediction for Alzheimer’s disease. *Brain* 2015;138:3673–3684.  
33  
34  
35  
36 42 Ritchie S, David Hill W, Riccardo E. Marioni RE, et al. Polygenic predictors of age-  
37 related decline in cognitive ability. *bioRxiv* Jul. 24, 2018;doi:  
38 <http://dx.doi.org/10.1101/375691>.  
39  
40  
41  
42  
43  
44 43 Fernandes M, Wan C, Tacutu R, et al. Systematic analysis of the gerontome reveals  
45 links between aging and age-related diseases. *Hum Mol Genet* 2016;25:4804-4818.  
46  
47  
48  
49  
50  
51  
52  
53  
54  
55  
56  
57  
58  
59  
60



All paths are mutually independent; only those  $p < 0.05$  are shown

90x90mm (300 x 300 DPI)

**Supplementary Table 1** Associations between path variables and each ACE-III subscale:  $\beta$  (95% confidence intervals)

|                            | Attention            | Memory               | Language            | Fluency                 | Visuospatial         |
|----------------------------|----------------------|----------------------|---------------------|-------------------------|----------------------|
| <i>APOE</i> $\epsilon 4^1$ | -0.05 (-0.1, 0.003)  | -0.03 (-0.08, 0.01)  | 0.009 (-0.05, 0.06) | 0.0003 (-0.04, 0.04)    | 0.003 (-0.05, 0.06)  |
| Father's social class      | -0.02 (-0.08, 0.03)  | 0.04 (-0.01, 0.09)   | 0.04 (-0.02, 0.09)  | 0.02 (-0.02, 0.05)*     | 0.04 (-0.02, 0.09)   |
| Mother's education         | 0.04 (-0.01, 0.09)   | 0.01 (-0.03, 0.06)   | -0.02 (-0.07, 0.03) | -0.007 (-0.04, 0.03)    | -0.02 (-0.07, 0.04)  |
| Childhood cognition        | 0.12 (0.05, 0.20)*** | 0.10 (0.04, 0.17)*** | -0.01, -0.08, 0.06) | -0.09 (-0.13, -0.04)*** | -0.008 (-0.08, 0.06) |
| Education                  | 0.05 (-0.01, 0.12)   | 0.07 (0.02, 0.13)*   | 0.05 (-0.01, 0.12)  | 0.09 (0.05, 0.13)***    | 0.06 (-0.001, 0.13)  |
| NART                       | 0.04 (-0.03, 0.11)   | 0.30 (0.23, 0.36)*** | 0.06 (-0.02, 0.14)  | 0.19 (0.14, 0.25)***    | 0.04 (-0.04, 0.12)   |
| Occupational complexity    | 0.01 (-0.04, 0.07)   | 0.05 (0.001, 0.10)*  | 0.06 (0.005, 0.12)* | 0.08 (0.05, 0.12)***    | 0.06 (0.004, 0.12)*  |

<sup>1</sup> -0.05 (-0.09, -0.002),  $p = 0.04$  for combined Attention and Memory

\*  $p < 0.05$ , \*\*\*  $p < 0.001$

**STROBE 2007 (v4) Statement—Checklist of items that should be included in reports of *cohort studies***

**Checklist completed for: Developmental and adult risk factors associated with decline in grip strength from midlife to old age: a British birth cohort study**

| Section/Topic                | Item # | Recommendation                                                                                                                                                                       | Reported on page # |
|------------------------------|--------|--------------------------------------------------------------------------------------------------------------------------------------------------------------------------------------|--------------------|
| Title and abstract           | 1      | (a) Indicate the study's design with a commonly used term in the title or the abstract                                                                                               | Title & abstract   |
|                              |        | (b) Provide in the abstract an informative and balanced summary of what was done and what was found                                                                                  | 2                  |
| <b>Introduction</b>          |        |                                                                                                                                                                                      |                    |
| Background/rationale         | 2      | Explain the scientific background and rationale for the investigation being reported                                                                                                 | 4-5                |
| Objectives                   | 3      | State specific objectives, including any prespecified hypotheses                                                                                                                     | 5                  |
| <b>Methods</b>               |        |                                                                                                                                                                                      |                    |
| Study design                 | 4      | Present key elements of study design early in the paper                                                                                                                              | 5-7                |
| Setting                      | 5      | Describe the setting, locations, and relevant dates, including periods of recruitment, exposure, follow-up, and data collection                                                      | 5-7                |
| Participants                 | 6      | (a) Give the eligibility criteria, and the sources and methods of selection of participants. Describe methods of follow-up                                                           | 5-7                |
|                              |        | (b) For matched studies, give matching criteria and number of exposed and unexposed                                                                                                  | n/a                |
| Variables                    | 7      | Clearly define all outcomes, exposures, predictors, potential confounders, and effect modifiers. Give diagnostic criteria, if applicable                                             | 6-7                |
| Data sources/<br>measurement | 8*     | For each variable of interest, give sources of data and details of methods of assessment (measurement). Describe comparability of assessment methods if there is more than one group | 6-7                |
| Bias                         | 9      | Describe any efforts to address potential sources of bias                                                                                                                            | 9                  |
| Study size                   | 10     | Explain how the study size was arrived at                                                                                                                                            | 5                  |
| Quantitative variables       | 11     | Explain how quantitative variables were handled in the analyses. If applicable, describe which groupings were chosen and why                                                         | 6-7, 8-9           |
| Statistical methods          | 12     | (a) Describe all statistical methods, including those used to control for confounding                                                                                                | 8-9                |
|                              |        | (b) Describe any methods used to examine subgroups and interactions                                                                                                                  | 8-9                |
|                              |        | (c) Explain how missing data were addressed                                                                                                                                          | 6-7,9              |
|                              |        | (d) If applicable, explain how loss to follow-up was addressed                                                                                                                       | 9                  |
|                              |        | (e) Describe any sensitivity analyses                                                                                                                                                | 9                  |

|                          |     |                                                                                                                                                                                                              |                     |
|--------------------------|-----|--------------------------------------------------------------------------------------------------------------------------------------------------------------------------------------------------------------|---------------------|
| <b>Results</b>           |     |                                                                                                                                                                                                              |                     |
| Participants             | 13* | (a) Report numbers of individuals at each stage of study—eg numbers potentially eligible, examined for eligibility, confirmed eligible, included in the study, completing follow-up, and analysed            | 5-7, all tables     |
|                          |     | (b) Give reasons for non-participation at each stage                                                                                                                                                         | 5,16                |
|                          |     | (c) Consider use of a flow diagram                                                                                                                                                                           | -                   |
| Descriptive data         | 14* | (a) Give characteristics of study participants (eg demographic, clinical, social) and information on exposures and potential confounders                                                                     | 9, Table 1          |
|                          |     | (b) Indicate number of participants with missing data for each variable of interest                                                                                                                          | Table 1             |
|                          |     | (c) Summarise follow-up time (eg, average and total amount)                                                                                                                                                  | 6                   |
| Outcome data             | 15* | Report numbers of outcome events or summary measures over time                                                                                                                                               | 6-12, all tables    |
| Main results             | 16  | (a) Give unadjusted estimates and, if applicable, confounder-adjusted estimates and their precision (eg, 95% confidence interval). Make clear which confounders were adjusted for and why they were included | 9-12, all tables    |
|                          |     | (b) Report category boundaries when continuous variables were categorized                                                                                                                                    | All relevant tables |
|                          |     | (c) If relevant, consider translating estimates of relative risk into absolute risk for a meaningful time period                                                                                             | -                   |
| Other analyses           | 17  | Report other analyses done—eg analyses of subgroups and interactions, and sensitivity analyses                                                                                                               | 12, all tables      |
| <b>Discussion</b>        |     |                                                                                                                                                                                                              |                     |
| Key results              | 18  | Summarise key results with reference to study objectives                                                                                                                                                     | 12-13               |
| <b>Limitations</b>       |     |                                                                                                                                                                                                              |                     |
| Interpretation           | 20  | Give a cautious overall interpretation of results considering objectives, limitations, multiplicity of analyses, results from similar studies, and other relevant evidence                                   | 14-15               |
| Generalisability         | 21  | Discuss the generalisability (external validity) of the study results                                                                                                                                        | 15-16               |
| <b>Other information</b> |     |                                                                                                                                                                                                              |                     |
| Funding                  | 22  | Give the source of funding and the role of the funders for the present study and, if applicable, for the original study on which the present article is based                                                | 24                  |

\*Give information separately for cases and controls in case-control studies and, if applicable, for exposed and unexposed groups in cohort and cross-sectional studies.

**Note:** An Explanation and Elaboration article discusses each checklist item and gives methodological background and published examples of transparent reporting. The STROBE checklist is best used in conjunction with this article (freely available on the Web sites of PLoS Medicine at <http://www.plosmedicine.org/>, Annals of Internal Medicine at <http://www.annals.org/>, and Epidemiology at <http://www.epidem.com/>). Information on the STROBE Initiative is available at [www.strobe-statement.org](http://www.strobe-statement.org).
