# Supplementary material for: Identifying the lifetime cognitive and socioeconomic antecedents of cognitive state: seven decades of follow-up in a British birth cohort study
Source: PubMed Central journal article supplement (PMC6502022; doi:10.1136/bmjopen-2018-024404), 2019-04-24
Supplement: bmjopen-2018-024404supp001.pdf [file bmjopen-2018-024404supp001.pdf]

**Supplementary Table 1** Associations between path variables and each ACE-III subscale:  $\beta$  (95% confidence intervals)

|                            | Attention            | Memory               | Language            | Fluency                 | Visuospatial         |
|----------------------------|----------------------|----------------------|---------------------|-------------------------|----------------------|
| <i>APOE</i> $\epsilon 4^1$ | -0.05 (-0.1, 0.003)  | -0.03 (-0.08, 0.01)  | 0.009 (-0.05, 0.06) | 0.0003 (-0.04, 0.04)    | 0.003 (-0.05, 0.06)  |
| Father's social class      | -0.02 (-0.08, 0.03)  | 0.04 (-0.01, 0.09)   | 0.04 (-0.02, 0.09)  | 0.02 (-0.02, 0.05)*     | 0.04 (-0.02, 0.09)   |
| Mother's education         | 0.04 (-0.01, 0.09)   | 0.01 (-0.03, 0.06)   | -0.02 (-0.07, 0.03) | -0.007 (-0.04, 0.03)    | -0.02 (-0.07, 0.04)  |
| Childhood cognition        | 0.12 (0.05, 0.20)*** | 0.10 (0.04, 0.17)*** | -0.01, -0.08, 0.06) | -0.09 (-0.13, -0.04)*** | -0.008 (-0.08, 0.06) |
| Education                  | 0.05 (-0.01, 0.12)   | 0.07 (0.02, 0.13)*   | 0.05 (-0.01, 0.12)  | 0.09 (0.05, 0.13)***    | 0.06 (-0.001, 0.13)  |
| NART                       | 0.04 (-0.03, 0.11)   | 0.30 (0.23, 0.36)*** | 0.06 (-0.02, 0.14)  | 0.19 (0.14, 0.25)***    | 0.04 (-0.04, 0.12)   |
| Occupational complexity    | 0.01 (-0.04, 0.07)   | 0.05 (0.001, 0.10)*  | 0.06 (0.005, 0.12)* | 0.08 (0.05, 0.12)***    | 0.06 (0.004, 0.12)*  |

<sup>1</sup> -0.05 (-0.09, -0.002),  $p = 0.04$  for combined Attention and Memory

\*  $p < 0.05$ , \*\*\*  $p < 0.001$
